# Supplementary material for: Characteristics of 5-year-olds who catch-up with MMR: findings from the UK Millennium Cohort Study
Source: PubMed Central journal article supplement — BMJ Open. 2013 Jul 16;3(7):e003152. doi: 10.1136/bmjopen-2013-003152 (PMC3717465; doi:10.1136/bmjopen-2013-003152), 2013-07-16
Supplement: bmjopen-2013-003152.draft_revisions.pdf [file bmjopen-2013-003152.draft_revisions.pdf]

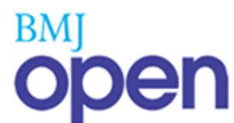

**Characteristics of five year olds who catch-up with MMR:  
findings from the UK Millennium Cohort Study**

|                                 |                                                                                                                                                                                                                       |
|---------------------------------|-----------------------------------------------------------------------------------------------------------------------------------------------------------------------------------------------------------------------|
| Journal:                        | <i>BMJ Open</i>                                                                                                                                                                                                       |
| Manuscript ID:                  | bmjopen-2013-003152                                                                                                                                                                                                   |
| Article Type:                   | Research                                                                                                                                                                                                              |
| Date Submitted by the Author:   | 02-May-2013                                                                                                                                                                                                           |
| Complete List of Authors:       | Pearce, Anna; UCL Institute of Child Health, Mindlin, Miranda; Kent, Surrey, Sussex Public Health England Centre, Cortina Borja, Mario; UCL, Institute of Child Health Bedford, Helen; UCL, Institute of Child Health |
| <b>Primary Subject Heading</b>: | Public health                                                                                                                                                                                                         |
| Secondary Subject Heading:      | Health policy, Infectious diseases                                                                                                                                                                                    |
| Keywords:                       | Socio-economic factors, immunisation, measles-mumps-rubella vaccine, measles, child health services                                                                                                                   |
|                                 |                                                                                                                                                                                                                       |

SCHOLARONE™  
Manuscripts

Peer review only

## Characteristics of five year olds who catch-up with MMR: findings from the UK Millennium Cohort

### Study

Anna Pearce (Research Fellow)<sup>1</sup>; Miranda Mindlin (Consultant in Communicable Disease Control)<sup>2,1</sup>;

Mario Cortina-Borja (Senior Lecturer)<sup>1</sup>; Helen Bedford (Senior Lecturer)<sup>1\*</sup>

<sup>1</sup>MRC Centre of Epidemiology for Child Health, UCL Institute of Child Health, 30 Guilford Street, London, WC1N 1EH, UK

<sup>2</sup> Kent, Surrey, Sussex Public Health England Centre, County Hall North, Chart Way, Horsham, West Sussex, RH12 1XA, UK

\*corresponding author and guarantor to the paper. [h.bedford@ucl.ac.uk](mailto:h.bedford@ucl.ac.uk). T 0207 905 2333; F 020 7905 2793

### Key words:

Socio-economic factors, immunisation, measles, measles-mumps-rubella vaccine, child health services

**Word count: 2999**

## Abstract

### *Objectives*

To examine predictors of partial and full MMR catch-up between three and five years

### *Design*

Secondary data analysis of the nationally representative Millennium Cohort Study (MCS)

### *Setting*

Children born in the UK, 2000-2

### *Participants*

751 MCS children who were unimmunised against measles, mumps and rubella at age three, with immunisation information at age five

### *Main outcome measures*

Catch-up status: unimmunised (received no MMR), partial catch-up (received one MMR), or full catch-up (received two MMRs)

### *Results*

At age five, 60.3% ( $n=440$ ) children remained unvaccinated, 16.1% ( $n=127$ ) had partially, and 23.6% ( $n=184$ ) had fully caught-up. Children from families who did not speak English at home were five times as likely to partially catch-up than children living in homes where only English was spoken (risk ratio: 4.68 [95% CI, 3.63-6.03]). Full catch-up was also significantly more likely in those did not speak English at home (adjusted risk ratio: 1.90 [1.08-3.32]). In addition, those from Pakistani /Bangladeshi (2.40 [1.38-4.18]) or 'other' ethnicities (such as Chinese) (1.88 [1.08-3.29]) were more likely to fully catch-up than White British. Those living in socially rented (1.86 [1.34-2.56]) or 'Other' (2.52 [1.23-5.18]) accommodations were more likely to fully catch-up than home owners, and families were more likely to catch-up if they lived outside London (1.95 [1.32-2.89]). Full catch-up was less likely if parents reported medical reasons (0.43 [0.25-0.74]), a conscious decision (0.33

1  
2  
3 [0.23-0.48]), or 'other' reasons (0.46 [0.29-0.73]) for not immunising at age three (compared to  
4  
5 'practical' reasons).  
6

### 7 *Conclusions*

8  
9  
10 Parents who partially or fully catch-up with MMR experience practical barriers and tend to come  
11  
12 from disadvantaged or ethnic minority groups. Families who continue to reject MMR tend to have  
13  
14 more advantaged backgrounds and make a conscious decision to not immunise early on. Health  
15  
16 professionals should consider these findings in light of the characteristics of their local populations.  
17  
18  
19  
20

### 21 **Article summary:**

#### 22 **Article focus**

- 23  
24  
25  
26 • Areas of the UK are currently experiencing measles outbreaks, and a MMR national catch-up  
27  
28 programme has just been launched
- 29  
30  
31 • Individual-level predictors of MMR catch-up are unknown
- 32  
33  
34 • We explore a range of risk factors for partial and full catch-up between age three and five years  
35  
36 in the nationally representative UK Millennium Cohort Study

#### 37 **Key messages**

- 38  
39  
40 • Of 751 children who were unimmunised at age three, 60% remained unimmunised at age five,  
41  
42 16% had partially caught-up, and 24% had fully caught-up
  - 43  
44  
45 • Two distinct groups of parents emerged:
    - 46  
47  
48 ○ those who experienced practical barriers and were from more disadvantaged groups –  
49  
50 these groups eventually caught-up
    - 51  
52  
53 ○ those who consciously rejected MMR and were from more advantaged circumstances –  
54  
55 these groups tended to remain unimmunised
- 56  
57  
58  
59  
60

- 1  
2  
3 • Health professionals should consider these findings in light of the characteristics of their local  
4  
5 populations when designing programmes to increase and maintain uptake  
6  
7

#### 8 **Strengths and limitations of this study**

9

- 10 • This is the first study to examine individual level characteristics of MMR catch-up in the UK; we  
11 do this using data from a cohort of children who were born at the height of the MMR scare and  
12 are currently being targeted by the national catch-up programme  
13  
14  
15  
16  
17 • We were unable to investigate exact timing of vaccination; therefore our analyses focus on  
18 children who were unimmunised at age three (so approximately 2 years after the  
19 recommended age of administration), and we were unable to detect how long children who had  
20 partially or fully caught-up by age five had been left susceptible  
21  
22  
23  
24  
25  
26  
27 • Our analyses refer to predictors of catch-up during a period when the incidence of measles was  
28 relatively low; during times of measles outbreaks the perceived risk-benefit balance of the  
29 vaccine shifts, particularly for advantaged families.  
30  
31  
32  
33  
34  
35  
36  
37  
38  
39  
40  
41  
42  
43  
44  
45  
46  
47  
48  
49  
50  
51  
52  
53  
54  
55  
56  
57  
58  
59  
60

## Introduction

The combined measles, mumps and rubella vaccination (MMR) has been used routinely in the UK since 1988. Coverage at 2 years of age peaked in 1995<sup>1</sup> at 92%. A two-dose schedule was introduced in 1996, the first dose recommended at soon after the age of 12/13 months<sup>2</sup> (affording 90% protection), with a second at three years four months<sup>2</sup> (99% protection). In 1998, a Lancet article<sup>3</sup> was widely interpreted as suggesting MMR was linked with autism and bowel problems. Although the paper was eventually discredited and retracted by the Lancet in 2010<sup>4</sup>, widespread adverse media coverage in the intervening years led to a dramatic fall in MMR uptake, to a low of 79% (of the first dose by age two) in 2003<sup>5</sup>. By 2006-7, 85% of two year olds had received at least one MMR, although only 73% had received the recommended two doses by age five, and levels were particularly low in some geographical areas, such as London<sup>6</sup>. As a result, the Health Protection Agency announced that in 2008 measles was again endemic in England and Wales.

Although coverage has continued to rise (in 2011-12, 91.2% of two year olds had received one and 86% of five year olds two doses of MMR<sup>7</sup>), levels remain below those needed for herd immunity, particularly in some geographical areas and in children who were born in the late 1990s and early 2000s. Consequently, measles outbreaks are currently occurring across some areas of the UK, and young teenagers are being disproportionately affected (one quarter of measles cases in 2011-12 were in 10-14 year olds<sup>8</sup>). In response to this, Public Health England, NHS England and the Department of Health announced a national MMR catch-up programme to vaccinate as many partially or unimmunised 10-16 year olds as possible by the start of the next school year (September 2013)<sup>9</sup>. This lays out aims to strengthen current routine immunisation strategies and in particular to target hard to reach populations; GPs and schools will play a central role. A better understanding of the social and demographic characteristics associated with catching-up (or not),

1  
2  
3 and the reasons reported by parents for their child's immunisation status, is essential if the aims of  
4  
5 the new framework are to be achieved and maintained. Cross-sectional evidence indicates that, at  
6  
7 age three, being unimmunised against MMR, or receiving the single antigen vaccines, was socially  
8  
9 distributed<sup>10</sup>. However little is known about the factors which influence the propensity of families  
10  
11 with unimmunised children to catch-up. We examine the social correlates of partial and full catch-  
12  
13 up with MMR between the age of three and five years, in a nationally representative cohort of  
14  
15 children born at the height of the MMR scare.  
16  
17  
18  
19

## 20 **Methods**

### 21 *Participants*

22  
23  
24 We analysed data from the Millennium Cohort Study (MCS), a longitudinal study of children eligible  
25  
26 for Child Benefit and born in the UK between September 2000 and January 2002. The sample was  
27  
28 derived from a random sample of electoral wards which were disproportionately stratified to  
29  
30 ensure an adequate representation of all four UK countries, deprived areas and, in the case of  
31  
32 England, areas with high proportions of families from ethnic minority groups<sup>11</sup>. At the first  
33  
34 contact, when the MCS children were aged 9 months, data were collected on 18,296 singleton  
35  
36 babies (72% of those approached); with subsequent data collections at three and five years. 71% of  
37  
38 the initial cohort responded to all three sweeps ( $n= 12,989$ ). Participants in the second and third  
39  
40 sweeps were less likely to be from ethnic or deprived wards<sup>12 13</sup>, although due to the sampling  
41  
42 design these proportions remained higher than the general population.  
43  
44  
45  
46  
47  
48  
49  
50

51  
52 Our analyses focus on the subsample of MCS singleton children who were unimmunised against  
53  
54 measles, mumps or rubella at age three years. Of the 804 children who were unimmunised at age  
55  
56 three, 777 (96.6%) had a recorded MMR outcome at five years, and 26 (3.3%) of them were  
57  
58  
59  
60

1  
2  
3 excluded because they were reported to have received at least one single antigen vaccine by age  
4  
5 five, leaving 751 eligible participants in our analyses.  
6  
7

### 8 9 10 *Measures*

11  
12 Measures were reported by the main respondent (usually the mother) during survey interviews,  
13  
14 which were carried out by trained interviewers in the home.  
15  
16

17  
18 Outcome measure: MMR status at age five was classified as unimmunised (received no combined  
19  
20 MMR vaccines), partially caught-up (received one combined MMR), or fully caught-up (received  
21  
22 two combined MMRs).  
23  
24  
25

26  
27  
28 Covariates: We explored socio-economic and demographic factors that were found to be associated  
29  
30 with immunisation status in earlier sweeps of the MCS<sup>10 14 15</sup>, or that were pertinent to  
31  
32 immunisation policy. We examined social class (based on National Statistics Socio-economic  
33  
34 Classification (NS-SEC)), ethnicity, maternal age at birth (in five-year age bands), maternal  
35  
36 education, and child gender. These measures were all captured at age nine months because they  
37  
38 were unlikely to have changed in later sweeps. In addition, we explored the following time-variant  
39  
40 measures, captured at age three (the beginning of the potential catch-up period): UK country of  
41  
42 residence, ward type ('advantaged', 'disadvantaged', 'ethnic'), number of children in the  
43  
44 household, maternal employment status, lone parenthood, household income, housing tenure,  
45  
46 whether resident in London, whether the family had changed residential address since age three,  
47  
48 and whether the parents reported the child having natural measles infection. Income data were  
49  
50 missing for 14% (122) children at age three; we supplemented this with information captured at  
51  
52  
53  
54  
55  
56  
57  
58  
59  
60



1  
2  
3 age nine months, reducing the level of missingness to 24. Missing data were very low for all other  
4  
5 measures (listed at the foot of Table 1).  
6  
7

8  
9  
10 We also investigated reasons given for not having had MMR at age three, classified in a previous  
11  
12 analysis<sup>10</sup> as 'practical' (such as missing an appointment), 'medical' (e.g. child had asthma),  
13  
14 'conscious decision' (including fear of links with autism) or 'other' (which included don't know). The  
15  
16 mean age of the MCS children at the third survey was 61 months, with a range between 52 and 72  
17  
18 months, meaning that some children had more time to catch-up than others. We therefore  
19  
20 explored age as a potential confounder, but as it was not found to be associated with immunisation  
21  
22 status ( $p=0.28$ ) we did not include it in our models. There were no *a priori* hypotheses for  
23  
24 interactions so none were explored.  
25  
26  
27  
28  
29

### 30 31 *Analysis*

32  
33 We estimated the prevalence of MMR status (unimmunised, partially caught-up, and fully caught-  
34  
35 up) at age five, overall and according to the potential explanatory factors. We then fitted Poisson  
36  
37 regression models to estimate risk ratios (RRs) and 95% confidence intervals (CIs) for partial and full  
38  
39 catch-up (in two separate models, because previous research indicates that the social correlates of  
40  
41 partial and full immunisation are likely to differ<sup>14</sup>). The models were built as follows: first we  
42  
43 explored univariable associations between the outcome and each of the explanatory variables.  
44  
45 Variables, which were associated with the outcome ( $p<0.10$ ) using Wald tests for trend, were  
46  
47 entered into a multivariable model using a forward stepwise model selection strategy. Residence in  
48  
49 London was forced into the multivariable models, due to its potential significance for policy. Only  
50  
51 measures which remained significantly associated with the outcome after adjustment were  
52  
53 retained.  
54  
55  
56  
57  
58  
59  
60

Data were downloaded from the UK Data Archive, University of Essex in May 2010. Analyses were carried out in Stata 12 (Stata Corporation, TX) using survey and response weights to allow for the sample design and attrition between sweeps<sup>12 16</sup>.

## Results

Of the 751 MCS children who were unimmunised at age three, 60.3% (440) remained unvaccinated, 16.1% (127) had partially caught-up, and 23.6% (184) had fully caught-up. Table 1 presents the proportion of children who were partially, fully, or unimmunised, according to the various predictor measures.

**Table 1: Weighted percentage (n) of children who remained unimmunised or who partially for fully caught-up with MMR, according to social, demographic and other characteristics**

|                                              | Total      | Full catch-up | Partial catch-up | Unimmunised |
|----------------------------------------------|------------|---------------|------------------|-------------|
| <b>Language spoken at home</b>               |            |               |                  |             |
| English only                                 | 91.6 (658) | 20.4 (130)    | 15.8 (11.5)      | 67.8 (413)  |
| English and other language(s)                | 5.7 (64)   | 53.0 (29)     | 15.0 (9)         | 32.0 (26)   |
| No - other language(s) only                  | 2.7 (29)   | 70.2 (25)     | 27.7 (3)         | 2.1 (1)     |
| <b>Ward type</b>                             |            |               |                  |             |
| Advantaged                                   | 56.5 (290) | 20.3 (60)     | 13.6 (43)        | 66.1 (187)  |
| Disadvantaged                                | 38.5 (5.0) | 24.1 (79)     | 20.1 (73)        | 55.8 (227)  |
| Ethnic                                       | 5.0 (82)   | 57.6 (45)     | 13.3 (11)        | 29.2 (26)   |
| <b>Ethnicity</b>                             |            |               |                  |             |
| British white                                | 87.5 (644) | 20.3 (126)    | 15.8 (111)       | 63.9 (407)  |
| Other white                                  | 2.2 (13)   | 10.3 (2)      | 15.6 (2)         | 74.1 (9)    |
| Mixed                                        | 1.4 (10)   | 33.5 (3)      | 15.1 (2)         | 51.4 (5)    |
| Indian                                       | 1.0 (12)   | 76.9 (9)      | 5.5 (1)          | 17.5 (2)    |
| Pakistani or Bangladeshi                     | 3.8 (39)   | 74.7 (28)     | 9.8 (3)          | 15.5 (8)    |
| Black or Black British                       | 2.7 (18)   | 24.7 (7)      | 35.1 (5)         | 40.2 (6)    |
| Other                                        | 1.4 (14)   | 65.2 (9)      | 19.6 (2)         | 15.2 (3)    |
| <b>Lone parent/carer</b>                     |            |               |                  |             |
| Two parents/carers                           | 79.2 (597) | 21.9 (142)    | 15.3 (97)        | 62.9        |
| One parent/carer                             | 20.8 (154) | 30.2 (42)     | 19.3 (30)        | 50.5 (82)   |
| <b>Maternal age at birth of cohort child</b> |            |               |                  |             |
| 14 - 19y                                     | 8.1 (60)   | 37.7 (21)     | 21.8 (14)        | 40.6 (25)   |
| 20-24y                                       | 15.9 (130) | 34.3 (40)     | 19.4 (27)        | 46.3 (63)   |

|                                                    |            |            |            |             |
|----------------------------------------------------|------------|------------|------------|-------------|
| 25-29y                                             | 23.5 (174) | 25.8 (52)  | 18.2 (27)  | 55.9 (95)   |
| 30-34y                                             | 27.6 (205) | 17.0 (36)  | 13.0 (30)  | 70.0 (13.9) |
| 35-39y                                             | 20.4 (145) | 15.8 (25)  | 14.3 (24)  | 70.0 (96)   |
| 40plus                                             | 4.5 (36)   | 24.2 (9)   | 10.6 (5)   | 65.1 (22)   |
| <b>Maternal education</b>                          |            |            |            |             |
| Degree                                             | 20.8 (152) | 18.8 (32)  | 10.4 (15)  | 70.7 (105)  |
| Diploma                                            | 8.9 (64)   | 13.9 (9)   | 14.9 (9)   | 71.1 (46)   |
| A or AS levels                                     | 11.3 (85)  | 22.7 (19)  | 17.0 (20)  | 60.2 (46)   |
| GCSE A*-C                                          | 32.2 (238) | 20.4 (48)  | 19.6 (50)  | 60.0 (140)  |
| GCSE D-G                                           | 8.4 (64)   | 18.1 (13)  | 23.9 (16)  | 58.0 (35)   |
| Other                                              | 1.9 (15)   | 25.1 (6)   | 7.7 (1)    | 67.2 (8)    |
| None                                               | 16.4 (133) | 44.5 (57)  | 13.4 (16)  | 42.1 (60)   |
| <b>Housing tenure age 3</b>                        |            |            |            |             |
| Owned                                              | 58.7 (451) | 18.1 (92)  | 15.6 (77)  | 66.3 (282)  |
| Privately rented                                   | 9.8 (71)   | 29.8 (18)  | 11.5 (8)   | 58.6 (45)   |
| Socially rented                                    | 27.7 (199) | 30.4 (65)  | 19.8 (37)  | 49.8 (16)   |
| Other                                              | 3.8 (30)   | 43.4 (9)   | 8.1 (5)    | 48.6 (16)   |
| <b>Household income (£ pa)</b>                     |            |            |            |             |
| 0-11000                                            | 23.7 (186) | 32.1 (57)  | 18.7 (34)  | 49.2 (95)   |
| 11 000-22 000                                      | 30.4 (228) | 23.4 (56)  | 18.2 (41)  | 58.4 (131)  |
| 22 000-33 000                                      | 19.9 (142) | 12.6 (21)  | 18.3 (34)  | 69.1 (87)   |
| 33 000-55 000                                      | 17.4 (123) | 20.6 (28)  | 6.8 (8)    | 72.6 (87)   |
| 55 000+                                            | 8.9 (48)   | 23.5 (11)  | 15.9 (8)   | 60.6 (29)   |
| <b>Social class (9 months)</b>                     |            |            |            |             |
| Managerial & professional                          | 30.2 (222) | 20.8 (42)  | 12.7 (34)  | 66.5 (14.6) |
| Intermediate                                       | 16.7 (119) | 17.5 (22)  | 17.6 (18)  | 65.0 (79)   |
| Small employer/self-employed                       | 8.0 (53)   | 10.1 (10)  | 11.9 (8)   | 78.0 (35)   |
| Lower supervisory & technical                      | 4.0 (33)   | 33.4 (10)  | 9.6 (4)    | 57.1 (19)   |
| Semi-routine & routine                             | 32.0 (248) | 24.4 (61)  | 20.6 (53)  | 54.9 (134)  |
| Never worked/unemployed                            | 9.2 (73)   | 47.8 (37)  | 15.6 (10)  | 36.6 (26)   |
| <b>Number of children in household (age 3)</b>     |            |            |            |             |
| One child                                          | 22.5 (180) | 26.2 (43)  | 20.0 (38)  | 53.8 (99)   |
| Two or three children                              | 63.1 (459) | 21.3 (104) | 15.5 (73)  | 63.2 (282)  |
| Four or more children                              | 14.4 (112) | 29.9 (37)  | 12.6 (16)  | 57.6 (59)   |
| <b>Maternal employment (age 3)</b>                 |            |            |            |             |
| FT                                                 | 11.2 (93)  | 23.8 (21)  | 11.5 (17)  | 64.7 (55)   |
| PT                                                 | 25.2 (191) | 22.1 (41)  | 19.6 (37)  | 58.3 (113)  |
| On leave                                           | 3.9 (28)   | 26.8 (8)   | 3.9 (1)    | 69.4 (19)   |
| Self employed                                      | 9.3 (60)   | 17.1 (13)  | 13.0 (10)  | 69.9 (37)   |
| Not employed/student                               | 50.4 (379) | 25.3 (101) | 16.9 (62)  | 57.8 (216)  |
| <b>Sex of child</b>                                |            |            |            |             |
| Male                                               | 55.1 (404) | 20.6 (95)  | 17.7 (70)  | 61.7 (239)  |
| Female                                             | 44.9 (347) | 27.3 (89)  | 14.1 (57)  | 58.6 (201)  |
| <b>Parental report of measles disease by age 3</b> |            |            |            |             |
| Yes                                                | 3.5 (22)   | 19.2 (5)   | 13.2 (3)   | 67.6 (14)   |
| No                                                 | 96.5 (721) | 23.7 (176) | 16.1 (123) | 60.2 (422)  |
| <b>Residence in London</b>                         |            |            |            |             |
| London                                             | 16.2 (102) | 17.7 (23)  | 20.0 (19)  | 62.3 (60)   |
| Not London                                         | 83.8 (649) | 24.8 (161) | 15.3 (108) | 60.0 (380)  |
| <b>Country of residence</b>                        |            |            |            |             |
| England                                            | 58.6 (462) | 23.3 (122) | 15.7 (74)  | 61.0 (266)  |

|                                                      |            |            |            |             |
|------------------------------------------------------|------------|------------|------------|-------------|
| Wales                                                | 21.6 (160) | 22.1 (31)  | 20.1 (31)  | 57.7 (98)   |
| Scotland                                             | 12.9 (87)  | 26.7 (21)  | 15.6 (14)  | 57.5 (52)   |
| Northern Ireland                                     | 6.9 (42)   | 25.3 (10)  | 17.8 (8)   | 60.0 (24)   |
| <b>Smoked during pregnancy</b>                       |            |            |            |             |
| No                                                   | 63.2 (465) | 23.4 (121) | 15.1 (76)  | 61.6 (268)  |
| Yes                                                  | 36.8 (283) | 23.8 (62)  | 18.0 (51)  | 58.2 (170)  |
| <b>Changed address since 3</b>                       |            |            |            |             |
| No                                                   | 85.6 (647) | 23.8 (161) | 16.6 (112) | 59.6 (374)  |
| Yes                                                  | 14.4 (104) | 22.4 (23)  | 13.1 (15)  | 64.5 (66)   |
| <b>Reasons given for not having had MMR (aged 3)</b> |            |            |            |             |
| Practical                                            | 6.2 (51)   | 54.5 (30)  | 15.3 (7)   | 30.3 (14)   |
| Medical                                              | 15.2 (107) | 17.9 (82)  | 25.5 (26)  | 56.7 (57)   |
| Conscious decision                                   | 66.7 (486) | 17.8 (82)  | 16.0 (85)  | 66.2 (31.9) |
| Other                                                | 11.7 (76)  | 35.3 (26)  | 9.9 (9)    | 54.9 (41)   |

Missing: Social class 3, smoked during pregnancy 3, income 24, ethnicity 1, reason 31, age at birth 1.

### *Partial catch-up (compared to remaining unimmunised)*

Table 2 (column A) shows unadjusted RRs for partial catch-up, according to each of the predictor measures. Partial catch-up was more likely in families who spoke a language other than English at home (particularly if English was not spoken at home at all), compared to those who only spoke English at home, and in those who lived in a ward classified as 'disadvantaged' or 'ethnic', compared to advantaged wards. No significant associations were seen with any of the other measures. When language, ward type and London residence (due to its policy significance) were entered into the multivariable model, only language remained significantly associated with the likelihood of being partially immunised, with an RR of 4.68 (3.63 to 6.03) in families who did not speak English at home (Table 2, Column B).

**Table 2: Unadjusted and adjusted odds ratios (ORs) for partial catch-up with the combined MMR vaccine (baseline unimmunised) by age five**

|                                | Partial catch-up   |                    | Full catch-up      |                    |
|--------------------------------|--------------------|--------------------|--------------------|--------------------|
|                                | A: uRR (95% CI)    | B: aRR (95% CI)    | C: uRR (95% CI)    | D: aRR (95% CI)    |
| <b>Language spoken at home</b> |                    |                    |                    |                    |
| English only                   | 1                  | 1                  | 1                  | 1                  |
| English and other language(s)  | 1.61 (0.96, 2.70)  | 1.61 (0.96, 2.70)  | 2.57 (2.00, 3.32)* | 1.54 (0.91, 2.63)  |
| Other language(s) only         | 4.68 (3.63, 6.03)* | 4.68 (3.63, 6.03)* | 4.00 (3.37, 4.76)* | 1.90 (1.08, 3.32)* |

|                                              |                    |        |                    |                    |
|----------------------------------------------|--------------------|--------|--------------------|--------------------|
| <i>p</i> -value                              | <0.001             | <0.001 | <0.001             | 0.0811             |
| <b>Ward type</b>                             |                    |        |                    |                    |
| Advantaged                                   | 1                  |        | 1                  |                    |
| Disadvantaged                                | 1.55 (1.05, 2.27)* |        | 1.29 (0.92, 1.80)  |                    |
| Ethnic                                       | 1.83 (1.18, 2.83)* |        | 2.83 (2.19, 3.65)* |                    |
| <i>p</i> -value                              | 0.0146             |        | <0.001             |                    |
| <b>Ethnicity</b>                             |                    |        |                    |                    |
| British white                                | 1                  |        | 1                  | 1                  |
| Other white                                  | 0.88 (0.22, 3.54)  |        | 0.51 (0.13, 2.06)  | 0.37 (0.10, 1.34)  |
| Mixed                                        | 1.15 (0.29, 4.59)  |        | 1.64 (0.57, 4.74)  | 1.83 (0.65, 5.17)  |
| Indian                                       | 1.21 (0.19, 7.82)  |        | 3.38 (2.40, 4.76)* | 2.01 (0.75, 5.41)  |
| Pakistani or Bangladeshi                     | 1.96 (0.84, 4.54)  |        | 3.44 (2.79, 4.23)* | 2.40 (1.38, 4.18)* |
| Black or Black British                       | 2.35 (0.99, 5.57)  |        | 1.58 (0.73, 3.43)  | 1.12 (0.35, 3.63)  |
| Other                                        | 2.84 (1.12, 7.22)* |        | 3.36 (2.42, 4.67)* | 1.88 (1.08, 3.29)* |
| <i>p</i> -value                              | 0.0126             |        | <0.001             | 0.0950             |
| <b>Lone parent/carer</b>                     |                    |        |                    |                    |
| Two parents/carers                           | 1                  |        | 1                  |                    |
| One parent/carer                             | 1.42 (0.92, 2.17)  |        | 1.45 (1.06, 1.99)* |                    |
| <i>p</i> -value                              | 0.1110             |        | 0.0208             |                    |
| <b>Maternal age at birth of cohort child</b> |                    |        |                    |                    |
| 14 - 19y                                     | 1.42 (0.80, 2.51)  |        | 1.52 (0.98, 2.37)  |                    |
| 20-24y                                       | 1.20 (0.68, 2.12)  |        | 1.35 (0.89, 2.03)  |                    |
| 25-29y                                       | 1                  |        | 1                  |                    |
| 30-34y                                       | 0.63 (0.37, 1.08)  |        | 0.62 (0.40, 0.97)* |                    |
| 35-39y                                       | 0.69 (0.40, 1.20)  |        | 0.58 (0.37, 0.92)* |                    |
| 40plus                                       | 0.57 (0.23, 1.43)  |        | 0.86 (0.42, 1.74)  |                    |
| <i>p</i> -value                              | 0.0259             |        | <0.001             |                    |
| <b>Maternal education</b>                    |                    |        |                    |                    |
| Degree                                       | 1                  |        | 1                  |                    |
| Diploma                                      | 1.35 (0.54, 3.36)  |        | 0.78 (0.35, 1.72)  |                    |
| A or AS levels                               | 1.72 (0.79, 3.74)  |        | 1.30 (0.71, 2.38)  |                    |
| Gcse a*-c                                    | 1.91 (1.05, 3.49)* |        | 1.21 (0.75, 1.96)  |                    |
| Gcse d-g                                     | 2.27 (1.07, 4.80)* |        | 1.13 (0.55, 2.34)  |                    |
| Other                                        | 0.80 (0.11, 5.93)  |        | 1.29 (0.49, 3.39)  |                    |
| None                                         | 1.88 (0.87, 4.03)  |        | 2.44 (1.63, 3.66)* |                    |
| <i>p</i> -value                              | 0.2420             |        | <0.001             |                    |
| <b>Housing tenure age 3</b>                  |                    |        |                    |                    |
| Owned                                        | 1                  |        | 1                  | 1                  |
| Privately rented                             | 0.86 (0.32, 2.34)  |        | 1.57 (0.96, 2.59)  | 1.51 (0.91, 2.48)  |
| Socially rented                              | 1.49 (0.96, 2.32)  |        | 1.77 (1.29, 2.43)* | 1.86 (1.34, 2.56)* |
| Other                                        | 0.75 (0.27, 2.09)  |        | 2.20 (1.27, 3.79)* | 2.52 (1.23, 5.18)* |
| <i>p</i> -value                              | 0.0936             |        | 0.0014             | <0.001             |
| <b>Household income (£ pa)</b>               |                    |        |                    |                    |
| 0-11000                                      | 1                  |        | 1                  |                    |
| 11 000-22 000                                | 0.86 (0.53, 1.41)  |        | 0.72 (0.52, 1.02)  |                    |
| 22 000-33 000                                | 0.76 (0.44, 1.31)  |        | 0.39 (0.23, 0.66)  |                    |
| 33 000-55 000                                | 0.31 (0.14, 0.70)* |        | 0.56 (0.36, 0.87)  |                    |
| 55 000+                                      | 0.76 (0.36, 1.61)  |        | 0.71 (0.39, 1.29)  |                    |
| <i>p</i> -value                              | 0.0816             |        | 0.0028             |                    |
| <b>Social class (9 months)</b>               |                    |        |                    |                    |
| Managerial & professional                    | 1                  |        | 1                  |                    |

|                                                      |                    |  |                    |                    |
|------------------------------------------------------|--------------------|--|--------------------|--------------------|
| Intermediate                                         | 1.33 (0.73, 2.42)  |  | 0.89 (0.52, 1.53)  |                    |
| Small employer/self-employed                         | 0.83 (0.38, 1.79)  |  | 0.48 (0.20, 1.16)  |                    |
| Lower supervisory & technical                        | 0.90 (0.30, 2.67)  |  | 1.55 (0.80, 3.00)  |                    |
| Semi-routine & routine                               | 1.71 (1.11, 2.64)* |  | 1.29 (0.87, 1.92)  |                    |
| Never worked/unemployed                              | 1.87 (0.96, 3.64)  |  | 2.38 (1.62, 3.49)* |                    |
| p-value                                              | 0.0989             |  | <0.001             |                    |
| <b>Number of children in household (age 3)</b>       |                    |  |                    |                    |
| One child                                            | 1                  |  | 1                  |                    |
| Two or three children                                | 0.73 (0.47, 1.12)  |  | 0.77 (0.52, 1.14)  |                    |
| Four or more children                                | 0.66 (0.34, 1.29)  |  | 1.04 (0.67, 1.63)  |                    |
| p-value                                              | 0.2807             |  | 0.1832             |                    |
| <b>Maternal employment (age 3)</b>                   |                    |  |                    |                    |
| Full-time                                            | 1                  |  | 1                  |                    |
| Part-time                                            | 1.67 (0.84, 3.33)  |  | 1.02 (0.58, 1.79)  |                    |
| On leave                                             | 0.35 (0.05, 2.48)  |  | 1.04 (0.46, 2.33)  |                    |
| Self employed                                        | 1.04 (0.41, 2.66)  |  | 0.73 (0.37, 1.45)  |                    |
| Not employed/student                                 | 1.50 (0.88, 2.57)  |  | 1.13 (0.71, 1.80)  |                    |
| p-value                                              | 0.1836             |  | 0.6517             |                    |
| <b>Sex of child</b>                                  |                    |  |                    |                    |
| Male                                                 | 1                  |  | 1                  |                    |
| Female                                               | 0.87 (0.60, 1.27)  |  | 1.27 (0.94, 1.71)  |                    |
| p-value                                              | 0.4755             |  | 0.1171             |                    |
| <b>Parental report of measles disease by age 3</b>   |                    |  |                    |                    |
| Yes                                                  | 1                  |  | 1                  |                    |
| No                                                   | 1.29 (0.48, 3.49)  |  | 1.28 (0.52, 3.16)  |                    |
| p-value                                              | 0.6163             |  | 0.5970             |                    |
| <b>Residence in London</b>                           |                    |  |                    |                    |
| London                                               | 1                  |  | 1                  | 1                  |
| Not London                                           | 0.84 (0.50, 1.41)  |  | 1.32 (0.86, 2.02)  | 1.95 (1.32, 2.89)* |
| p-value                                              | 0.5078             |  | 0.2012             | <0.001             |
| <b>Country of residence</b>                          |                    |  |                    |                    |
| England                                              | 1                  |  | 1                  |                    |
| Wales                                                | 1.26 (0.86, 1.84)  |  | 1.00 (0.69, 1.46)  |                    |
| Scotland                                             | 1.04 (0.60, 1.83)  |  | 1.16 (0.71, 1.88)  |                    |
| Northern Ireland                                     | 1.16 (0.55, 2.44)  |  | 1.11 (0.66, 1.88)  |                    |
| p-value                                              | 0.6802             |  | 0.9272             |                    |
| <b>Smoked during pregnancy</b>                       |                    |  |                    |                    |
| No                                                   | 1                  |  | 1                  |                    |
| Yes                                                  | 1.20 (0.73, 1.74)  |  | 0.05 (0.76, 1.46)  |                    |
| p-value                                              | 0.3202             |  | 0.7481             |                    |
| <b>Changed address since 3</b>                       |                    |  |                    |                    |
| No                                                   | 1                  |  |                    |                    |
| Yes                                                  | 0.90 (0.62, 1.32)  |  | 0.77 (0.42, 1.43)  |                    |
| p-value                                              | 0.6031             |  | 0.4112             |                    |
| <b>Reasons given for not having had MMR (aged 3)</b> |                    |  |                    |                    |
| Practical                                            | 1                  |  | 1                  |                    |
| Medical                                              | 0.93 (0.44, 1.93)  |  | 0.37 (0.20, 0.68)* | 0.43 (0.25, 0.74)* |
| Conscious decision                                   | 0.58 (0.27, 1.22)  |  | 0.33 (0.23, 0.47)* | 0.33 (0.23, 0.48)* |
| Other                                                | 0.45 (0.16, 1.30)  |  | 0.61 (0.40, 0.93)* | 0.46 (0.29, 0.73)* |
| p-value                                              | 0.1357             |  | <0.001             | <0.001             |

1  
2  
3 *Full catch-up (compared to remaining unimmunised)*  
4

5 Table 2 also presents unadjusted and adjusted RRs for fully catching up. In the univariable analysis  
6 (Column C), children whose parents spoke a language other than English in the home (as opposed  
7 to only speaking English), who were from ethnic minority groups (compared to White British), or  
8 living in 'ethnic' wards (compared to 'advantaged' wards) were more likely to fully catch-up. Catch-  
9 up was also significantly more likely in children who mother had no educational qualifications  
10 (compared to a degree), in lone parent families (compared to two parent families), and in those  
11 living in 'socially rented' or 'other' tenure types (compared to own/mortgage). Catch-up was  
12 significantly less likely in children with a mother in her thirties (compared to 24-29 years), and in  
13 children living in higher income households. Children whose parents had reported a non-practical  
14 reason ('medical', 'conscious decision', or 'other') for not having their child immunised with the  
15 combined MMR at age three were also less likely to have fully caught-up than those reporting  
16 practical reasons. Living in London was not associated with immunisation status, although due to  
17 its policy significance was included in the multivariable model reported below.  
18  
19  
20  
21  
22  
23  
24  
25  
26  
27  
28  
29  
30  
31  
32  
33  
34  
35  
36  
37

38 In the multivariable analysis (Column D), full catch-up remained significantly more likely in those  
39 who only spoke a non-English language at home (1.90 [1.08 to 3.32]), when compared to those who  
40 only spoke English. Those from Pakistani or Bangladeshi (2.40 [1.38 to 4.18]), and 'Other' (1.88  
41 [1.08 to 3.29]) ethnic groups were more likely to have caught-up than White British groups, as were  
42 those living in 'socially rented' (1.86 [1.34 to 2.56]) or 'other' (2.52 [1.23 to 5.18]) tenure types  
43 (compared to own/mortgage). Full catch-up was also more likely in families living outside London  
44 (1.95 [1.32 to 2.89]). Compared to those reporting practical reasons for not having been  
45 immunised at age three, children whose parents reported medical reasons (0.43 [0.25 to 0.74]), a  
46  
47  
48  
49  
50  
51  
52  
53  
54  
55  
56  
57  
58  
59  
60

1  
2  
3 conscious decision (0.33 [0.23 to 0.48]), or 'other' reasons (0.46 [0.29 to 0.73]) were considerably  
4  
5 less likely to have fully caught-up.  
6  
7

## 8 9 **Discussion**

10  
11 Just over 40% of children who were unimmunised with MMR vaccine at age three had either  
12  
13 partially or fully caught-up by age five (of which more than caught-up fully). The likelihood of  
14  
15 catching-up varied markedly with a number of social factors, and more so for full than partial catch-  
16  
17 up. Some families, particularly those from ethnic minority groups, appear to have difficulty  
18  
19 accessing the vaccination schedule in a timely fashion. Advantaged families and those citing non-  
20  
21 practical reasons for non-vaccination at age three are more likely to persist in not immunising their  
22  
23 child against MMR.  
24  
25  
26  
27

28  
29  
30 We used sample and response weights to account for the survey design and attrition between the  
31  
32 first, second, and third sweeps. However the non-response weights are unlikely to have entirely  
33  
34 accounted for differential response; for example 95.7% children who were included in the age three  
35  
36 and five surveys were fully immunised with the primary vaccines (at age 9 months) compared to  
37  
38 92.7% in children who did not take part in both of the later surveys ( $p<0.001$ ). Information bias may  
39  
40 occur when using parental report to measure immunisation status, however there is no gold  
41  
42 standard measure and studies have found disagreement between parental report and health  
43  
44 records to be low<sup>17</sup> and not socially distributed<sup>18</sup>. Parents were given the opportunity to consult the  
45  
46 Personal Child Health Record (or 'red book'). Of the 751 families included in our analysis, 19% (137)  
47  
48 consulted the book and found the relevant information, 1% (11) checked the book and did not find  
49  
50 the relevant information, and 79% (603) chose not to consult the book. There was no association  
51  
52 between catch-up status and whether the parent consulted the red book ( $p=0.18$ ), and the  
53  
54  
55  
56  
57  
58  
59  
60



1  
2  
3 associations reported in this paper remained the same when analyses were repeated excluding  
4  
5 children where the parent had looked but not found information (data not shown). A small number  
6  
7 (26) of children who were unimmunised at age three had received at least one single antigen  
8  
9 vaccine by age five. Due to low numbers we were unable to explore the characteristics of this  
10  
11 group.  
12  
13

14  
15  
16  
17 The intense negative media attention around MMR vaccine peaked in 2002/3 when the MCS  
18  
19 children were toddlers. These findings therefore provide important information on the barriers to  
20  
21 catch-up, in a cohort of children who are currently experiencing measles outbreaks throughout the  
22  
23 UK<sup>8</sup>, and are a central focus of the newly launched national catch-up programme. We measured  
24  
25 catch-up across the period 2003/5 to 2006/7, when the incidence of measles was low, although  
26  
27 beginning to increase. It is likely that some of the barriers we report for more advantaged families  
28  
29 are reduced during times of measles outbreaks, as the perceived risk-benefit balance of the vaccine  
30  
31 shifts. Nonetheless, this paper provides important information on the barriers experienced by  
32  
33 advantaged families during times of no outbreak to improve and sustain the current MMR  
34  
35 programme, which is also a central aim of the catch-up programme. The recommended age of the  
36  
37 first dose of MMR is 12/13 months; however information on uptake was not collected in the MCS  
38  
39 until the children were age three years. Our analysis is unable to address those children who were  
40  
41 immunised by age three but who had not been immunised on time. Similarly, we were unable to  
42  
43 investigate the timing of catch-up between the age of three and five, and therefore how long  
44  
45 children who partially or fully caught-up were left susceptible.  
46  
47  
48  
49  
50  
51

52  
53  
54 Before the scare, MMR uptake was generally lower in more deprived areas and households<sup>19 20</sup>.

55  
56 Since 1998, rates declined faster in more advantaged areas<sup>21 22</sup> and more slowly in areas with lower  
57  
58  
59  
60

1  
2  
3 proportions of highly educated residents<sup>21</sup> and in minority ethnic groups<sup>23</sup>. Earlier cross-sectional  
4  
5 findings from the MCS demonstrated that the likelihood of being unimmunised against measles,  
6  
7 mumps and rubella tended to be greater in more disadvantaged families, while children living in  
8  
9 more affluent households were more likely to receive single antigen vaccines (indicating conscious  
10  
11 rejection of combined MMR)<sup>10</sup>. However there is a dearth of longitudinal research exploring the  
12  
13 social correlates of catch-up with MMR. The only study, to our knowledge, which has explored the  
14  
15 social correlates of MMR catch-up was an ecological study of one million children born between  
16  
17 1987 and 2004 in Scotland. The authors found that children living in more affluent areas were  
18  
19 either immunised with MMR on time or not at all, whereas children living in deprived areas were  
20  
21 more likely to be immunised late<sup>22</sup>. Our findings not only reflect this, but add to the evidence base  
22  
23 by demonstrating that individual-level predictors of catch-up are strongly related to catch-up. We  
24  
25 have also found that remaining unvaccinated with MMR at age five was associated with non-  
26  
27 practical reasons for not immunising with MMR at three, reflecting other research which has shown  
28  
29 that more affluent families are more likely to consciously reject MMR<sup>22,24</sup>.

30  
31  
32  
33  
34  
35  
36  
37  
38 Outbreaks of measles are currently being experienced across the UK, leading to the launch of a  
39  
40 national catch-programme in April 2013. Approaches to optimise uptake of MMR will need to be  
41  
42 tailored to the needs of local populations, both now and into the future. Our study has identified  
43  
44 two distinct groups of families that do not immunise their child with MMR in a timely fashion  
45  
46 (during periods of low measles incidence). The first comprises those who partially or fully catch-up,  
47  
48 amounting to 40% of those who were unimmunised at age three. These families tend to experience  
49  
50 practical barriers to immunisation, and are socially disadvantaged or from ethnic minority groups.  
51  
52  
53  
54 The second group, which continues to reject MMR and makes up the remaining 60%, consists of  
55  
56 parents who consciously reject MMR from the start, and are from more advantaged backgrounds.  
57  
58  
59  
60

1  
2  
3  
4  
5 Steps are required to minimise time to uptake in those families who do eventually catch-up,  
6  
7 through the reduction of practical barriers. NICE guidance outlines actions to reduce inequalities in  
8  
9 immunisation<sup>25</sup>, including provision of information in multiple languages, offering immunisation  
10  
11 checks and administration in alternative settings, and sending out reminder invitations from GPs<sup>26</sup>.  
12  
13 In addition, alleviating any lingering fears and concerns of families who consciously reject MMR is  
14  
15 essential. This should include discussion of concerns about 'medical' reasons for not giving MMR, as  
16  
17 there are very few true contraindications for MMR vaccination. NICE recommends offering parents  
18  
19 opportunities to discuss their concerns with health professionals; receiving such information from  
20  
21 health professionals has been found to be the decisive factor for parents who have changed their  
22  
23 minds about previously rejected or delayed vaccines<sup>27</sup>. In addition training is recommended for  
24  
25 health care professionals to equip them with the skills and information needed to communicate  
26  
27 effectively with parents about immunisation. Finally, joint working between the health sector and  
28  
29 childcare providers, nurseries, and schools is essential<sup>25</sup>.  
30  
31  
32  
33  
34  
35  
36  
37  
38

### 39 Conclusions

40 Children born at the height of the MMR scare are being disproportionately affected by current  
41  
42 measles outbreaks and are the target of a newly launched national catch-up programme. Our  
43  
44 findings refer to children of this age and have identified the characteristics of two distinct groups of  
45  
46 parents who do not immunise their children with MMR on time. Health professionals should  
47  
48 consider their local populations in light of our findings, and tailor the local roll-out of the catch-up  
49  
50 programme accordingly.  
51  
52  
53  
54  
55  
56  
57  
58  
59  
60

1  
2  
3 The new national immunisation framework not only aims to facilitate catch-up but also to  
4  
5 strengthen routine approaches to immunisation<sup>9</sup>. Findings from this study should be used to inform  
6  
7 longer-term local and national planning to improve and maintain timely uptake. While uptake of  
8  
9 the first dose of MMR in younger age groups has increased, levels remains below those required for  
10  
11 herd immunity and uptake of the second dose is lower. Measles outbreaks remain a risk,  
12  
13 particularly in areas of the country with low uptake.  
14  
15  
16  
17  
18  
19

### 20 **Acknowledgements**

21  
22 We would like to thank all the Millennium Cohort families for their participation, and the director of  
23  
24 the Millennium Cohort Study and colleagues in the management team at the Centre for  
25  
26 Longitudinal Studies, Institute of Education, University of London. We would also like to thank the  
27  
28 MCS user group at the MRC Centre of Epidemiology for Child Health: Catherine Law, Carol  
29  
30 Dezateux, Lucy Griffiths, Tim Cole, Phillippa Cumberland, Jamie Fagg, Francesco Sera, Steven Hope,  
31  
32 Hannah Lewis and Marco Geraci; also David Elliman, for his advice early on in the project.  
33  
34  
35

### 36 **Funding**

37  
38 The Centre for Paediatric Epidemiology and Biostatistics is supported in part by the Medical  
39  
40 Research Council in its capacity as the MRC Centre of Epidemiology for Child Health (Grant  
41  
42 reference G0400546). Research at the UCL Institute of Child Health and Great Ormond Street  
43  
44 Hospital for Children receives a proportion of the funding from the Department of Health's National  
45  
46 Institute for Health Research Biomedical Research Centres funding scheme. All researchers were  
47  
48 independent of the funders and the funders played no part in the study design, analysis or  
49  
50 interpretation of the data, writing of the report or the decision to submit for publication.  
51  
52  
53

54  
55 **Contributors:** MM and HB contributed to the study conception. All authors contributed to the  
56  
57 design of the analysis. AP, MM and MC-B carried out the analyses. AP and MM drafted the paper.  
58  
59  
60

1  
2  
3 All authors revised the paper. All authors had full access to the data and take responsibility for the  
4  
5 integrity of the data and accuracy of the data analysis.  
6

7 **Ethics approval:** Research ethics approval was not required for this study as it was a secondary data  
8  
9 analysis of the UK Millennium Cohort Study. The first sweep of the Millennium Cohort Study  
10  
11 received ethics approval from National Health Service Ethical Authority in February 2001  
12  
13 (MREC/01/6/19), and the second and third received approval from the London Multi-Centre  
14  
15 Research Ethics Committee in September 2004 (MREC/03/2/022) and December 2005  
16  
17 (05/MRE02/46).  
18  
19  
20

21 **Data sharing:** The Millennium Cohort Study is available at:

22  
23 <http://www.esds.ac.uk/findingData/mcs.asp>  
24  
25

#### 26 **Competing interests**

27  
28 All authors have completed the ICMJE uniform disclosure form at [ww.icmje.org/coi\\_disclosure.pdf](http://www.icmje.org/coi_disclosure.pdf)  
29  
30 and declare: no support from any organisation for the submitted work; MCB has received research  
31  
32 grants from the Health Protection Agency; no other relationships or activities that could appear to  
33  
34 have influenced the submitted work.  
35  
36

#### 37 **Copyright/licence for publication**

38  
39 I, Helen Bedford, the Corresponding Author of this article contained within the original manuscript  
40  
41 which includes any diagrams & photographs, other illustrative material, video, film or any other  
42  
43 material howsoever submitted by the Contributor(s) at any time and related to the Contribution  
44  
45 (“the Contribution”) have the right to grant on behalf of all authors and do grant on behalf of all  
46  
47 authors, a licence to the BMJ Publishing Group Ltd and its licensees, to permit this Contribution (if  
48  
49 accepted) to be published in BMJ Open and any other BMJ Group products and to exploit all  
50  
51 subsidiary rights, as set out in the licence at: [http://group.bmj.com/products/journals/instructions-](http://group.bmj.com/products/journals/instructions-for-authors/BMJOpen_licence.pdf)  
52  
53 [for-authors/BMJOpen\\_licence.pdf](http://group.bmj.com/products/journals/instructions-for-authors/BMJOpen_licence.pdf)  
54  
55  
56  
57  
58  
59  
60

## Reference List

1. Communicable Disease Surveillance Centre. COVER/Korner July to September 1995. *CDR weekly* 1995;5:301.
2. Salisbury D, Ramsay M, Noakes K. Immunisation against infectious disease: the green book. In: England PH, editor, 2013.
3. Wakefield AJ, Murch SH, Anthony A, Linnell J, Casson DM, Malik M, et al. Ileal-lymphoid-nodular hyperplasia, non-specific colitis, and pervasive developmental disorder in children. *Lancet* 1998;351 (9103):637-41.
4. Lancet. Retraction--Ileal-lymphoid-nodular hyperplasia, non-specific colitis, and pervasive developmental disorder in children. 2010 Feb *Lancet*. 2010;375(9713):445.
5. Health Protection Agency. COVER programme: January to March 2003. *CDR weekly* 2003;91(6):465-68.
6. The Information Centre. NHS Immunisation Statistics: England 2006-07, 2007.
7. The Health and Social Care Information Centre Screening and Immunisations team. NHS Immunisation Statistics, England: 2011-12 In: Centre TI, editor, 2012.
8. Health Protection Agency. Confirmed cases of measles by region and age: 1996-2012. [http://www.hpa.org.uk/web/HPAweb&HPAwebStandard/HPAweb\\_C/1195733778332](http://www.hpa.org.uk/web/HPAweb&HPAwebStandard/HPAweb_C/1195733778332): Public Health England, 2013.
9. Public Health England. MMR catch-up programme 2013. . <https://www.gov.uk/government/organisations/public-health-england/series/MMR-catch-up-programme-2013#publications>: GOV.UK, 2013.
10. Pearce A, Law C, Elliman D, Cole TJ, Bedford H, the Millennium Cohort Study Child Health G. Factors associated with uptake of measles, mumps and rubella vaccine (MMR) and use of single antigen vaccines in a contemporary UK cohort: prospective cohort study. *British Medical Journal* 2008;336:754-60.
11. Centre for Longitudinal Studies. Millennium Cohort Study: Survey design: Institute of Education, 2007.
12. Plewis I, Ketende S. Millennium Cohort Study: technical report on response. 1st ed. London Centre for Longitudinal Studies, 2006.
13. Hansen K, Joshi H. Millennium Cohort Study Third Survey: A User's Guide to Initial Findings. London: Institute of Education 2008.
14. Samad L, Bedford H, Tate AR, Dezateux C, Peckham C, Butler N, et al. Differences in risk factors for partial and no immunisation in the first year of life. *British Medical Journal* 2006;332 1312-13.
15. Pearce A, Elliman D, Bedford H, Law C. Residential mobility and uptake of childhood immunisations: findings from the UK Millennium Cohort Study. *Vaccine* 2008;26:1675-80.
16. Plewis I. Millennium Cohort Study: technical report on sampling. 3rd ed. . London: Centre for Longitudinal Studies, 2004.
17. AbdelSalam HHM, Sokal MM. Accuracy of parental reporting of immunization. *Clinical Pediatrics* 2004;43 (1):83-85.
18. Suarez L, Simpson DM, Smith DR. Errors and correlates in parental recall of child immunizations: effects on vaccination coverage estimates. *Pediatrics* 1997;99 (5):E3.
19. Sharland M, Atkinson P, Maguire H, Begg N. Lone parent families are an independent risk factor for lower rates of childhood immunisation in London. *Communicable Disease Report.CDR Review* 1997;7 (11):R196-R72.

- 1  
2  
3 20. Li J, Taylor B. Factors affecting uptake of measles, mumps, and rubella immunisation. *British*  
4 *Medical Journal* 1993;307 168-71.  
5  
6 21. Middleton E, Baker D. Comparison of social distribution of immunisation with measles, mumps,  
7 and rubella vaccine, England, 1991-2001. *British Medical Journal* 2003;326 854-54.  
8  
9 22. Friederichs V, Cameron JC, Robertson C. Impact of adverse publicity on MMR vaccine uptake: a  
10 population based analysis of vaccine uptake records for one million children, born 1987-  
11 2004. *Archives of Disease in Childhood* 2006;91 465-68.  
12  
13 23. Hawker J, Olowokure B, Wood A, Wilson R, Johnson R. Widening inequalities in MMR vaccine  
14 uptake rates among ethnic groups in an urban area of the UK during a period of vaccine  
15 controversy (1994-2000). *Vaccine* 2007;25:7516-9.  
16  
17 24. MacDonald H, Henderson R, Oates K. Low uptake of immunisation: contributing factors.  
18 *Community Practioner* 2004;77 (3):95-100.  
19  
20 25. National Institute for Health and Clinical Excellence. Reducing differences in the uptake of  
21 immunisations. *NICE public health guidance 21*, 2009.  
22  
23 26. Jacobson Vann J, Szilagyi P. Patient reminder and patient recall systems to improve  
24 immunization rates. . *Cochrane Database Syst Rev*. 2005;Jul 20(3).  
25  
26 27. Gust D, Darling N, Kennedy A, Schwartz B. Parents with doubts about vaccines: which vaccines  
27 and reasons why. *Pediatrics* 2008;1227(4):18-25.  
28  
29  
30  
31  
32  
33  
34  
35  
36  
37  
38  
39  
40  
41  
42  
43  
44  
45  
46  
47  
48  
49  
50  
51  
52  
53  
54  
55  
56  
57  
58  
59  
60

STROBE 2007 (v4) Statement—Checklist of items that should be included in reports of cohort studies

| Section/Topic             | Item # | Recommendation                                                                                                                                                                       | Reported on page # |
|---------------------------|--------|--------------------------------------------------------------------------------------------------------------------------------------------------------------------------------------|--------------------|
| Title and abstract        | 1      | (a) Indicate the study’s design with a commonly used term in the title or the abstract                                                                                               | 1                  |
|                           |        | (b) Provide in the abstract an informative and balanced summary of what was done and what was found                                                                                  | 2-3                |
| <b>Introduction</b>       |        |                                                                                                                                                                                      |                    |
| Background/rationale      | 2      | Explain the scientific background and rationale for the investigation being reported                                                                                                 | 5-6                |
| Objectives                | 3      | State specific objectives, including any prespecified hypotheses                                                                                                                     | 2, 6               |
| <b>Methods</b>            |        |                                                                                                                                                                                      |                    |
| Study design              | 4      | Present key elements of study design early in the paper                                                                                                                              | 2, 6               |
| Setting                   | 5      | Describe the setting, locations, and relevant dates, including periods of recruitment, exposure, follow-up, and data collection                                                      | 6-7                |
| Participants              | 6      | (a) Give the eligibility criteria, and the sources and methods of selection of participants. Describe methods of follow-up                                                           | 6-7                |
|                           |        | (b) For matched studies, give matching criteria and number of exposed and unexposed                                                                                                  |                    |
| Variables                 | 7      | Clearly define all outcomes, exposures, predictors, potential confounders, and effect modifiers. Give diagnostic criteria, if applicable                                             | 7-8                |
| Data sources/ measurement | 8*     | For each variable of interest, give sources of data and details of methods of assessment (measurement). Describe comparability of assessment methods if there is more than one group | 7                  |
| Bias                      | 9      | Describe any efforts to address potential sources of bias                                                                                                                            | 9, 11              |
| Study size                | 10     | Explain how the study size was arrived at                                                                                                                                            | 6-7                |
| Quantitative variables    | 11     | Explain how quantitative variables were handled in the analyses. If applicable, describe which groupings were chosen and why                                                         | 7                  |
| Statistical methods       | 12     | (a) Describe all statistical methods, including those used to control for confounding                                                                                                | 8                  |
|                           |        | (b) Describe any methods used to examine subgroups and interactions                                                                                                                  |                    |
|                           |        | (c) Explain how missing data were addressed                                                                                                                                          | 7-8, 9             |
|                           |        | (d) If applicable, explain how loss to follow-up was addressed                                                                                                                       | 9                  |
|                           |        | (e) Describe any sensitivity analyses                                                                                                                                                |                    |
| <b>Results</b>            |        |                                                                                                                                                                                      |                    |

1  
2  
3  
4  
5  
6  
7  
8  
9  
10  
11  
12  
13  
14  
15  
16  
17  
18  
19  
20  
21  
22  
23  
24  
25  
26  
27  
28  
29  
30  
31  
32  
33  
34  
35  
36  
37  
38  
39  
40  
41  
42  
43  
44  
45  
46  
47  
48  
49



|                          |     |                                                                                                                                                                                                              |         |
|--------------------------|-----|--------------------------------------------------------------------------------------------------------------------------------------------------------------------------------------------------------------|---------|
| Participants             | 13* | (a) Report numbers of individuals at each stage of study—eg numbers potentially eligible, examined for eligibility, confirmed eligible, included in the study, completing follow-up, and analysed            | 6-7     |
|                          |     | (b) Give reasons for non-participation at each stage                                                                                                                                                         | 6-7     |
|                          |     | (c) Consider use of a flow diagram                                                                                                                                                                           |         |
| Descriptive data         | 14* | (a) Give characteristics of study participants (eg demographic, clinical, social) and information on exposures and potential confounders                                                                     | Table 2 |
|                          |     | (b) Indicate number of participants with missing data for each variable of interest                                                                                                                          | Table 2 |
|                          |     | (c) Summarise follow-up time (eg, average and total amount)                                                                                                                                                  | 8       |
| Outcome data             | 15* | Report numbers of outcome events or summary measures over time                                                                                                                                               | 9       |
| Main results             | 16  | (a) Give unadjusted estimates and, if applicable, confounder-adjusted estimates and their precision (eg, 95% confidence interval). Make clear which confounders were adjusted for and why they were included | Table 3 |
|                          |     | (b) Report category boundaries when continuous variables were categorized                                                                                                                                    | Table 2 |
|                          |     | (c) If relevant, consider translating estimates of relative risk into absolute risk for a meaningful time period                                                                                             |         |
| Other analyses           | 17  | Report other analyses done—eg analyses of subgroups and interactions, and sensitivity analyses                                                                                                               | 11      |
| <b>Discussion</b>        |     |                                                                                                                                                                                                              |         |
| Key results              | 18  | Summarise key results with reference to study objectives                                                                                                                                                     | 11      |
| <b>Limitations</b>       |     |                                                                                                                                                                                                              |         |
| Interpretation           | 20  | Give a cautious overall interpretation of results considering objectives, limitations, multiplicity of analyses, results from similar studies, and other relevant evidence                                   | 11-13   |
| Generalisability         | 21  | Discuss the generalisability (external validity) of the study results                                                                                                                                        | 12      |
| <b>Other information</b> |     |                                                                                                                                                                                                              |         |
| Funding                  | 22  | Give the source of funding and the role of the funders for the present study and, if applicable, for the original study on which the present article is based                                                | 15      |

\*Give information separately for cases and controls in case-control studies and, if applicable, for exposed and unexposed groups in cohort and cross-sectional studies.

**Note:** An Explanation and Elaboration article discusses each checklist item and gives methodological background and published examples of transparent reporting. The STROBE checklist is best used in conjunction with this article (freely available on the Web sites of PLoS Medicine at <http://www.plosmedicine.org/>, Annals of Internal Medicine at <http://www.annals.org/>, and Epidemiology at <http://www.epidem.com/>). Information on the STROBE Initiative is available at [www.strobe-statement.org](http://www.strobe-statement.org).



**Characteristics of five year olds who catch-up with MMR:  
findings from the UK Millennium Cohort Study**

|                                 |                                                                                                                                                                                                                       |
|---------------------------------|-----------------------------------------------------------------------------------------------------------------------------------------------------------------------------------------------------------------------|
| Journal:                        | <i>BMJ Open</i>                                                                                                                                                                                                       |
| Manuscript ID:                  | bmjopen-2013-003152.R1                                                                                                                                                                                                |
| Article Type:                   | Research                                                                                                                                                                                                              |
| Date Submitted by the Author:   | 14-Jun-2013                                                                                                                                                                                                           |
| Complete List of Authors:       | Pearce, Anna; UCL Institute of Child Health, Mindlin, Miranda; Kent, Surrey, Sussex Public Health England Centre, Cortina Borja, Mario; UCL, Institute of Child Health Bedford, Helen; UCL, Institute of Child Health |
| <b>Primary Subject Heading</b>: | Public health                                                                                                                                                                                                         |
| Secondary Subject Heading:      | Infectious diseases, Health policy                                                                                                                                                                                    |
| Keywords:                       | Socio-economic factors, immunisation, measles-mumps-rubella vaccine, measles, child health services                                                                                                                   |
|                                 |                                                                                                                                                                                                                       |

SCHOLARONE™  
Manuscripts

Peer Review Only

## Characteristics of five year olds who catch-up with MMR: findings from the UK Millennium Cohort

### Study

Anna Pearce (Research Fellow)<sup>1</sup>; Miranda Mindlin (Consultant in Communicable Disease Control)<sup>2,1</sup>;

Mario Cortina-Borja (Senior Lecturer)<sup>1</sup>; Helen Bedford (Senior Lecturer)<sup>1\*</sup>

<sup>1</sup>MRC Centre of Epidemiology for Child Health, UCL Institute of Child Health, 30 Guilford Street, London, WC1N 1EH, UK

<sup>2</sup> Kent, Surrey, Sussex Public Health England Centre, County Hall North, Chart Way, Horsham, West Sussex, RH12 1XA, UK

\*corresponding author and guarantor to the paper. [h.bedford@ucl.ac.uk](mailto:h.bedford@ucl.ac.uk). T 0207 905 2333; F 020 7905 2793

### Key words:

Socio-economic factors, immunisation, measles, measles-mumps-rubella vaccine, child health services

**Word count: 3441**

## Abstract

### *Objectives*

To examine predictors of partial and full MMR catch-up between three and five years

### *Design*

Secondary data analysis of the nationally representative Millennium Cohort Study (MCS)

### *Setting*

Children born in the UK, 2000-2

### *Participants*

751 MCS children who were unimmunised against measles, mumps and rubella at age three, with immunisation information at age five

### *Main outcome measures*

Catch-up status: unimmunised (received no MMR), partial catch-up (received one MMR), or full catch-up (received two MMRs)

### *Results*

At age five, 60.3% ( $n=440$ ) children remained unvaccinated, 16.1% ( $n=127$ ) had partially, and 23.6% ( $n=184$ ) had fully caught-up. Children from families who did not speak English at home were five times as likely to partially catch-up than children living in homes where only English was spoken (risk ratio: 4.68 [95% CI, 3.63-6.03]). Full catch-up was also significantly more likely in those did not speak English at home (adjusted risk ratio: 1.90 [1.08-3.32]). In addition, those from Pakistani /Bangladeshi (2.40 [1.38-4.18]) or 'other' ethnicities (such as Chinese) (1.88 [1.08-3.29]) were more likely to fully catch-up than White British. Those living in socially rented (1.86 [1.34-2.56]) or 'Other' (2.52 [1.23-5.18]) accommodations were more likely to fully catch-up than home owners, and families were more likely to catch-up if they lived outside London (1.95 [1.32-2.89]). Full catch-up was less likely if parents reported medical reasons (0.43 [0.25-0.74]), a conscious decision (0.33

1  
2  
3 [0.23-0.48]), or 'other' reasons (0.46 [0.29-0.73]) for not immunising at age three (compared to  
4  
5 'practical' reasons).  
6

### 7 *Conclusions*

8  
9  
10 Parents who partially or fully catch-up with MMR experience practical barriers and tend to come  
11  
12 from disadvantaged or ethnic minority groups. Families who continue to reject MMR tend to have  
13  
14 more advantaged backgrounds and make a conscious decision to not immunise early on. Health  
15  
16 professionals should consider these findings in light of the characteristics of their local populations.  
17  
18  
19  
20

### 21 **Article summary:**

#### 22 **Article focus**

- 23  
24  
25  
26 • Areas of the UK are currently experiencing measles outbreaks, and a MMR national catch-up  
27  
28 programme has just been launched
- 29  
30  
31 • Individual-level predictors of MMR catch-up are unknown
- 32  
33  
34 • We explore a range of risk factors for partial and full catch-up between age three and five years  
35  
36 in the nationally representative UK Millennium Cohort Study

#### 37 **Key messages**

- 38  
39  
40 • Of 751 children who were unimmunised at age three, 60% remained unimmunised at age five,  
41  
42 16% had partially caught-up, and 24% had fully caught-up
- 43  
44  
45 • Two distinct groups of parents emerged:  
46  
47
  - 48 ○ those who experienced practical barriers and were from ethnic minority backgrounds –  
49  
50 these groups eventually caught-up
  - 51  
52 ○ those who consciously rejected MMR and were from more advantaged circumstances –  
53  
54 these groups tended to remain unimmunised
- 55  
56  
57  
58  
59  
60

- 1  
2  
3 • Health professionals should consider these findings in light of the characteristics of their local  
4  
5 populations when designing programmes to increase and maintain uptake  
6  
7

#### 8 **Strengths and limitations of this study**

9

- 10 • This is the first study to examine individual-level characteristics of MMR catch-up in the UK; we  
11 do this using data from a nationally representative cohort of children who were born at the  
12 height of the MMR scare and are currently being targeted by the national catch-up programme  
13  
14 • Our analyses refer to predictors of catch-up during a period when parental concerns around the  
15 safety of the vaccine were relatively high, and the incidence of measles relatively low;  
16  
17 predictors of catch- up in families with young children today may be different .  
18  
19 • We were unable to investigate exact timing of vaccination; therefore our analyses focus on  
20 children who were unimmunised at age three (so approximately 2 years after the  
21 recommended age of administration), and we were unable to detect how long children who had  
22 partially or fully caught-up by age five had been left susceptible  
23  
24  
25  
26  
27  
28  
29  
30  
31  
32  
33  
34  
35  
36  
37  
38  
39  
40  
41  
42  
43  
44  
45  
46  
47  
48  
49  
50  
51  
52  
53  
54  
55  
56  
57  
58  
59  
60

## Introduction

The combined measles, mumps and rubella vaccination (MMR) has been used routinely in the UK since 1988. Coverage at 2 years of age peaked in England in 1995, at 92%<sup>1</sup>. A two-dose schedule was introduced in 1996, the first dose recommended at soon after the age of 12/13 months<sup>2</sup> (affording 90-95% protection against measles), with a second at three years four months<sup>2</sup> (99% protection). In 1998, a Lancet article<sup>3</sup> was widely interpreted as suggesting MMR was linked with autism and bowel problems. Although the paper was eventually discredited and retracted by the Lancet in 2010<sup>4</sup>, widespread adverse media coverage in the intervening years led to a dramatic fall in MMR uptake, to a low of 80% in England (of the first dose by age two) in 2003<sup>1</sup>. By 2006-7, 85% of two year olds had received at least one MMR, although only 73% had received the recommended two doses by age five, and levels were particularly low in some geographical areas, such as London<sup>1</sup>. Measles cases started to rise and in 2008 the Health Protection Agency announced that measles was again endemic in England and Wales.

Although coverage has continued to rise (in England in 2011-12, 91% of two year olds had received one and 86% of five year olds two doses of MMR<sup>5</sup>), levels remain below those needed for herd immunity, particularly in some geographical areas and in children who were born in the late 1990s and early 2000s. Consequently, measles outbreaks are currently occurring across some areas of the UK, with young teenagers disproportionately affected (one quarter of measles cases in 2011-12 were in 10-14 year olds<sup>6</sup>). In response to this, Public Health England, NHS England and the Department of Health announced a national MMR catch-up programme to vaccinate as many partially or unimmunised 10-16 year olds as possible by the start of the next school year (September 2013)<sup>7</sup>. The catch-up programme outlines aims to strengthen current routine immunisation strategies and in particular to target hard to reach populations; GPs and schools will

1  
2  
3 play a central role. A better understanding of the social and demographic characteristics associated  
4  
5 with catching-up (or not), and the reasons reported by parents for their child's immunisation status,  
6  
7 is essential if the aims of the new framework are to be achieved and maintained. Cross-sectional  
8  
9 evidence indicates that, at age three, being unimmunised against MMR, or receiving the single  
10  
11 antigen vaccines, was socially distributed<sup>8</sup>. However little is known about the factors which  
12  
13 influence the propensity of families with unimmunised children to catch-up. We examine the social  
14  
15 correlates of partial and full catch-up with MMR between the age of three and five years, in a  
16  
17 nationally representative cohort of children born at the height of the MMR scare.  
18  
19  
20  
21

## 22 **Methods**

### 23 *Participants*

24  
25  
26 We analysed data from the Millennium Cohort Study (MCS), a longitudinal study of children eligible  
27  
28 for Child Benefit and born in the UK between September 2000 and January 2002. The sample was  
29  
30 derived from a random sample of electoral wards which were disproportionately stratified to  
31  
32 ensure an adequate representation of all four UK countries, deprived areas and, in the case of  
33  
34 England, areas with high proportions of families from ethnic minority groups<sup>9</sup>. At the first contact,  
35  
36 when the MCS children were aged 9 months, data were collected on 18,296 singleton babies (72%  
37  
38 of those approached); with subsequent data collections at three and five years. 71% of the initial  
39  
40 cohort responded to all three sweeps ( $n=12,989$ ). Participants in the second and third sweeps  
41  
42 were less likely to be from ethnic or deprived wards<sup>10;11</sup>, although due to the sampling design these  
43  
44 proportions remained higher than the general population.  
45  
46  
47  
48  
49  
50  
51

52  
53  
54 Our analyses focus on the subsample of MCS singleton children who were unimmunised against  
55  
56 measles, mumps or rubella at age three years. Of the 804 children who were unimmunised at age  
57  
58  
59  
60



1  
2  
3 three, 777 (96.6%) had a recorded MMR outcome at five years, and 26 (3.3%) of them were  
4  
5 excluded because they were reported to have received at least one single antigen vaccine by age  
6  
7 five, leaving 751 eligible participants in our analyses. Compared to the unimmunised children (who  
8  
9 are the focus of this analysis), children who had been immunised with MMR at age three were: less  
10  
11 likely to have a mother with a degree or A-levels, and more likely to have a mother in her twenties  
12  
13 or early thirties or who did not smoke during pregnancy; they were also less likely to be living in a  
14  
15 lone parent family and more likely to be an only child. The socio-economic and demographic  
16  
17 characteristics of children according to MMR status at age three is described in greater detail  
18  
19 elsewhere<sup>8</sup>.  
20  
21  
22  
23  
24  
25  
26

### 27 *Measures*

28  
29 Measures were reported by the main respondent (usually the mother) during survey interviews,  
30  
31 which were carried out by trained interviewers in the home.  
32  
33  
34  
35

36 Outcome measure: MMR status at age five was classified as unimmunised (received no combined  
37  
38 MMR vaccines), partially caught-up (received one combined MMR), or fully caught-up (received  
39  
40 two combined MMRs).  
41  
42  
43  
44

45 Covariates: We explored socio-economic and demographic factors that were found to be associated  
46  
47 with immunisation status in earlier sweeps of the MCS<sup>8;12;13</sup>, or that were pertinent to  
48  
49 immunisation policy. We examined maternal social class (based on National Statistics Socio-  
50  
51 economic Classification (NS-SEC)), ethnicity, maternal age at birth (in five-year age bands), maternal  
52  
53 education, and child gender. These measures were all captured at age nine months because they  
54  
55 were unlikely to have changed in later sweeps. In addition, we explored the following time-variant  
56  
57  
58  
59  
60

1  
2  
3 measures, captured at age three (the beginning of the potential catch-up period): UK country of  
4  
5 residence, ward type ('advantaged', 'disadvantaged', 'ethnic'), number of children in the  
6  
7 household, maternal employment status, lone parenthood, household income, housing tenure,  
8  
9 whether resident in London, whether the family had changed residential address since age three,  
10  
11 and whether the parents reported the child having natural measles infection. Income data were  
12  
13 missing for 14% (122) children at age three; we supplemented this with information captured at  
14  
15 age nine months, reducing the level of missingness to 24. Missing data were very low for all other  
16  
17 measures (listed at the foot of Table 1).  
18  
19  
20  
21  
22  
23

24 We also investigated reasons given for not having had MMR at age three, classified in a previous  
25  
26 analysis<sup>10</sup> as 'practical' (such as missing an appointment), 'medical' (e.g. child had asthma),  
27  
28 'conscious decision' (including fear of links with autism) or 'other' (which included don't know). The  
29  
30 mean age of the MCS children at the third survey was 61 months, with a range between 52 and 72  
31  
32 months, meaning that some children had more time to catch-up than others. We therefore  
33  
34 explored age as a potential confounder, but as it was not found to be associated with immunisation  
35  
36 status ( $p=0.28$ ) we did not include it in our models. There were no *a priori* hypotheses for  
37  
38 interactions so none were explored.  
39  
40  
41  
42  
43  
44

#### 45 *Analysis*

46  
47 We estimated the prevalence of MMR status (unimmunised, partially caught-up, and fully caught-  
48  
49 up) at age five, overall and according to the potential explanatory factors. We then fitted Poisson  
50  
51 regression models to estimate risk ratios (RRs) and 95% confidence intervals (CIs) for partial and full  
52  
53 catch-up (in two separate models, because previous research indicates that the social correlates of  
54  
55 partial and full immunisation are likely to differ<sup>12</sup>). The models were built as follows: first we  
56  
57  
58  
59  
60

1  
2  
3 explored univariable associations between the outcome and each of the explanatory variables.  
4  
5 Variables, which were associated with the outcome ( $p < 0.10$ ) using Wald tests for trend, were  
6  
7 entered into a multivariable model using a forward stepwise model selection strategy. Residence in  
8  
9 London was forced into the multivariable models, due to its potential significance for policy. Only  
10  
11 measures which remained significantly associated with the outcome after adjustment were  
12  
13 retained.  
14  
15

16  
17  
18  
19 Data were downloaded from the UK Data Archive, University of Essex in May 2010. Analyses were  
20  
21 carried out in Stata 12 (Stata Corporation, TX) using survey and response weights to allow for the  
22  
23 sample design and attrition between sweeps<sup>10;14</sup>.  
24  
25  
26  
27  
28

## 29 Results

30  
31 Of the 751 MCS children who were unimmunised at age three, 60.3% (440) remained unvaccinated,  
32  
33 16.1% (127) had partially caught-up, and 23.6% (184) had fully caught-up. Table 1 presents the  
34  
35 proportion of children who were partially, fully, or unimmunised, according to the various predictor  
36  
37 measures.  
38  
39

40  
41 **Table 1: Weighted percentage (n) of children who remained unimmunised or who partially for**  
42  
43 **fully caught-up with MMR, according to social, demographic and other characteristics**  
44

|                                | Total      | Full catch-up<br>(2 doses) | Partial catch-up<br>(1 dose) | Unimmunised |
|--------------------------------|------------|----------------------------|------------------------------|-------------|
| <b>Language spoken at home</b> |            |                            |                              |             |
| English only                   | 91.6 (658) | 20.4 (130)                 | 15.8 (11.5)                  | 67.8 (413)  |
| English and other language(s)  | 5.7 (64)   | 53.0 (29)                  | 15.0 (9)                     | 32.0 (26)   |
| No - other language(s) only    | 2.7 (29)   | 70.2 (25)                  | 27.7 (3)                     | 2.1 (1)     |
| <b>Ward type</b>               |            |                            |                              |             |
| Advantaged                     | 56.5 (290) | 20.3 (60)                  | 13.6 (43)                    | 66.1 (187)  |
| Disadvantaged                  | 38.5 (5.0) | 24.1 (79)                  | 20.1 (73)                    | 55.8 (227)  |
| Ethnic                         | 5.0 (82)   | 57.6 (45)                  | 13.3 (11)                    | 29.2 (26)   |
| <b>Ethnicity</b>               |            |                            |                              |             |
| British white                  | 87.5 (644) | 20.3 (126)                 | 15.8 (111)                   | 63.9 (407)  |

|                                                |            |            |           |             |
|------------------------------------------------|------------|------------|-----------|-------------|
| Other white                                    | 2.2 (13)   | 10.3 (2)   | 15.6 (2)  | 74.1 (9)    |
| Mixed                                          | 1.4 (10)   | 33.5 (3)   | 15.1 (2)  | 51.4 (5)    |
| Indian                                         | 1.0 (12)   | 76.9 (9)   | 5.5 (1)   | 17.5 (2)    |
| Pakistani or Bangladeshi                       | 3.8 (39)   | 74.7 (28)  | 9.8 (3)   | 15.5 (8)    |
| Black or Black British                         | 2.7 (18)   | 24.7 (7)   | 35.1 (5)  | 40.2 (6)    |
| Other                                          | 1.4 (14)   | 65.2 (9)   | 19.6 (2)  | 15.2 (3)    |
| <b>Lone parent/carer</b>                       |            |            |           |             |
| Two parents/carers                             | 79.2 (597) | 21.9 (142) | 15.3 (97) | 62.9        |
| One parent/carer                               | 20.8 (154) | 30.2 (42)  | 19.3 (30) | 50.5 (82)   |
| <b>Maternal age at birth of cohort child</b>   |            |            |           |             |
| 14 - 19y                                       | 8.1 (60)   | 37.7 (21)  | 21.8 (14) | 40.6 (25)   |
| 20-24y                                         | 15.9 (130) | 34.3 (40)  | 19.4 (27) | 46.3 (63)   |
| 25-29y                                         | 23.5 (174) | 25.8 (52)  | 18.2 (27) | 55.9 (95)   |
| 30-34y                                         | 27.6 (205) | 17.0 (36)  | 13.0 (30) | 70.0 (13.9) |
| 35-39y                                         | 20.4 (145) | 15.8 (25)  | 14.3 (24) | 70.0 (96)   |
| 40plus                                         | 4.5 (36)   | 24.2 (9)   | 10.6 (5)  | 65.1 (22)   |
| <b>Maternal education</b>                      |            |            |           |             |
| Degree                                         | 20.8 (152) | 18.8 (32)  | 10.4 (15) | 70.7 (105)  |
| Diploma                                        | 8.9 (64)   | 13.9 (9)   | 14.9 (9)  | 71.1 (46)   |
| A or AS levels                                 | 11.3 (85)  | 22.7 (19)  | 17.0 (20) | 60.2 (46)   |
| GCSE A*-C                                      | 32.2 (238) | 20.4 (48)  | 19.6 (50) | 60.0 (140)  |
| GCSE D-G                                       | 8.4 (64)   | 18.1 (13)  | 23.9 (16) | 58.0 (35)   |
| Other                                          | 1.9 (15)   | 25.1 (6)   | 7.7 (1)   | 67.2 (8)    |
| None                                           | 16.4 (133) | 44.5 (57)  | 13.4 (16) | 42.1 (60)   |
| <b>Housing tenure age 3</b>                    |            |            |           |             |
| Owned                                          | 58.7 (451) | 18.1 (92)  | 15.6 (77) | 66.3 (282)  |
| Privately rented                               | 9.8 (71)   | 29.8 (18)  | 11.5 (8)  | 58.6 (45)   |
| Socially rented                                | 27.7 (199) | 30.4 (65)  | 19.8 (37) | 49.8 (16)   |
| Other                                          | 3.8 (30)   | 43.4 (9)   | 8.1 (5)   | 48.6 (16)   |
| <b>Household income (£ pa)</b>                 |            |            |           |             |
| 0-11000                                        | 23.7 (186) | 32.1 (57)  | 18.7 (34) | 49.2 (95)   |
| 11 000-22 000                                  | 30.4 (228) | 23.4 (56)  | 18.2 (41) | 58.4 (131)  |
| 22 000-33 000                                  | 19.9 (142) | 12.6 (21)  | 18.3 (34) | 69.1 (87)   |
| 33 000-55 000                                  | 17.4 (123) | 20.6 (28)  | 6.8 (8)   | 72.6 (87)   |
| 55 000+                                        | 8.9 (48)   | 23.5 (11)  | 15.9 (8)  | 60.6 (29)   |
| <b>Social class (9 months)</b>                 |            |            |           |             |
| Managerial & professional                      | 30.2 (222) | 20.8 (42)  | 12.7 (34) | 66.5 (14.6) |
| Intermediate                                   | 16.7 (119) | 17.5 (22)  | 17.6 (18) | 65.0 (79)   |
| Small employer/self-employed                   | 8.0 (53)   | 10.1 (10)  | 11.9 (8)  | 78.0 (35)   |
| Lower supervisory & technical                  | 4.0 (33)   | 33.4 (10)  | 9.6 (4)   | 57.1 (19)   |
| Semi-routine & routine                         | 32.0 (248) | 24.4 (61)  | 20.6 (53) | 54.9 (134)  |
| Never worked/unemployed                        | 9.2 (73)   | 47.8 (37)  | 15.6 (10) | 36.6 (26)   |
| <b>Number of children in household (age 3)</b> |            |            |           |             |
| One child                                      | 22.5 (180) | 26.2 (43)  | 20.0 (38) | 53.8 (99)   |
| Two or three children                          | 63.1 (459) | 21.3 (104) | 15.5 (73) | 63.2 (282)  |
| Four or more children                          | 14.4 (112) | 29.9 (37)  | 12.6 (16) | 57.6 (59)   |
| <b>Maternal employment (age 3)</b>             |            |            |           |             |
| FT                                             | 11.2 (93)  | 23.8 (21)  | 11.5 (17) | 64.7 (55)   |
| PT                                             | 25.2 (191) | 22.1 (41)  | 19.6 (37) | 58.3 (113)  |
| On leave                                       | 3.9 (28)   | 26.8 (8)   | 3.9 (1)   | 69.4 (19)   |
| Self employed                                  | 9.3 (60)   | 17.1 (13)  | 13.0 (10) | 69.9 (37)   |

|                                                      |            |            |            |             |
|------------------------------------------------------|------------|------------|------------|-------------|
| Not employed/student                                 | 50.4 (379) | 25.3 (101) | 16.9 (62)  | 57.8 (216)  |
| <b>Sex of child</b>                                  |            |            |            |             |
| Male                                                 | 55.1 (404) | 20.6 (95)  | 17.7 (70)  | 61.7 (239)  |
| Female                                               | 44.9 (347) | 27.3 (89)  | 14.1 (57)  | 58.6 (201)  |
| <b>Parental report of measles disease by age 3</b>   |            |            |            |             |
| Yes                                                  | 3.5 (22)   | 19.2 (5)   | 13.2 (3)   | 67.6 (14)   |
| No                                                   | 96.5 (721) | 23.7 (176) | 16.1 (123) | 60.2 (422)  |
| <b>Residence in London</b>                           |            |            |            |             |
| London                                               | 16.2 (102) | 17.7 (23)  | 20.0 (19)  | 62.3 (60)   |
| Not London                                           | 83.8 (649) | 24.8 (161) | 15.3 (108) | 60.0 (380)  |
| <b>Country of residence</b>                          |            |            |            |             |
| England                                              | 58.6 (462) | 23.3 (122) | 15.7 (74)  | 61.0 (266)  |
| Wales                                                | 21.6 (160) | 22.1 (31)  | 20.1 (31)  | 57.7 (98)   |
| Scotland                                             | 12.9 (87)  | 26.7 (21)  | 15.6 (14)  | 57.5 (52)   |
| Northern Ireland                                     | 6.9 (42)   | 25.3 (10)  | 17.8 (8)   | 60.0 (24)   |
| <b>Smoked during pregnancy</b>                       |            |            |            |             |
| No                                                   | 63.2 (465) | 23.4 (121) | 15.1 (76)  | 61.6 (268)  |
| Yes                                                  | 36.8 (283) | 23.8 (62)  | 18.0 (51)  | 58.2 (170)  |
| <b>Changed address since 3</b>                       |            |            |            |             |
| No                                                   | 85.6 (647) | 23.8 (161) | 16.6 (112) | 59.6 (374)  |
| Yes                                                  | 14.4 (104) | 22.4 (23)  | 13.1 (15)  | 64.5 (66)   |
| <b>Reasons given for not having had MMR (aged 3)</b> |            |            |            |             |
| Practical                                            | 6.2 (51)   | 54.5 (30)  | 15.3 (7)   | 30.3 (14)   |
| Medical                                              | 15.2 (107) | 17.9 (82)  | 25.5 (26)  | 56.7 (57)   |
| Conscious decision                                   | 66.7 (486) | 17.8 (82)  | 16.0 (85)  | 66.2 (31.9) |
| Other                                                | 11.7 (76)  | 35.3 (26)  | 9.9 (9)    | 54.9 (41)   |

Missing: Social class 3, smoked during pregnancy 3, income 24, ethnicity 1, reason 31, age at birth 1.

### *Partial catch-up (compared to remaining unimmunised)*

Table 2 (column A) shows unadjusted RRs for partial catch-up, according to each of the predictor measures. Partial catch-up was more likely in families who spoke a language other than English at home (particularly if English was not spoken at home at all), compared to those who only spoke English at home, and in those who lived in a ward classified as 'disadvantaged' or 'ethnic', compared to advantaged wards. No significant associations were seen with any of the other variables. When language, ward type and London residence (due to its policy significance) were entered into the multivariable model, only language remained significantly associated with the likelihood of being partially immunised, with an adjusted RR of 4.68 (3.63 to 6.03) in families who did not speak English at home (Table 2, Column B).

**Table 2: Unadjusted and adjusted odds ratios (ORs) for partial catch-up with the combined MMR vaccine (baseline unimmunised) by age five**

|                                              | Partial catch-up<br>(1 dose) |                    | Full catch-up<br>(2 doses) |                    |
|----------------------------------------------|------------------------------|--------------------|----------------------------|--------------------|
|                                              | A: uRR (95% CI)              | B: aRR (95% CI)    | C: uRR (95% CI)            | D: aRR (95% CI)    |
| <b>Language spoken at home</b>               |                              |                    |                            |                    |
| English only                                 | 1                            | 1                  | 1                          | 1                  |
| English and other language(s)                | 1.61 (0.96, 2.70)            | 1.61 (0.96, 2.70)  | 2.57 (2.00, 3.32)*         | 1.54 (0.91, 2.63)  |
| Other language(s) only                       | 4.68 (3.63, 6.03)*           | 4.68 (3.63, 6.03)* | 4.00 (3.37, 4.76)*         | 1.90 (1.08, 3.32)* |
| <i>p</i> -value                              | <0.001                       | <0.001             | <0.001                     | 0.0811             |
| <b>Ward type</b>                             |                              |                    |                            |                    |
| Advantaged                                   | 1                            |                    | 1                          |                    |
| Disadvantaged                                | 1.55 (1.05, 2.27)*           |                    | 1.29 (0.92, 1.80)          |                    |
| Ethnic                                       | 1.83 (1.18, 2.83)*           |                    | 2.83 (2.19, 3.65)*         |                    |
| <i>p</i> -value                              | 0.0146                       |                    | <0.001                     |                    |
| <b>Ethnicity</b>                             |                              |                    |                            |                    |
| British white                                | 1                            |                    | 1                          | 1                  |
| Other white                                  | 0.88 (0.22, 3.54)            |                    | 0.51 (0.13, 2.06)          | 0.37 (0.10, 1.34)  |
| Mixed                                        | 1.15 (0.29, 4.59)            |                    | 1.64 (0.57, 4.74)          | 1.83 (0.65, 5.17)  |
| Indian                                       | 1.21 (0.19, 7.82)            |                    | 3.38 (2.40, 4.76)*         | 2.01 (0.75, 5.41)  |
| Pakistani or Bangladeshi                     | 1.96 (0.84, 4.54)            |                    | 3.44 (2.79, 4.23)*         | 2.40 (1.38, 4.18)* |
| Black or Black British                       | 2.35 (0.99, 5.57)            |                    | 1.58 (0.73, 3.43)          | 1.12 (0.35, 3.63)  |
| Other                                        | 2.84 (1.12, 7.22)*           |                    | 3.36 (2.42, 4.67)*         | 1.88 (1.08, 3.29)* |
| <i>p</i> -value                              | 0.0126                       |                    | <0.001                     | 0.0950             |
| <b>Lone parent/carers</b>                    |                              |                    |                            |                    |
| Two parents/carers                           | 1                            |                    | 1                          |                    |
| One parent/carers                            | 1.42 (0.92, 2.17)            |                    | 1.45 (1.06, 1.99)*         |                    |
| <i>p</i> -value                              | 0.1110                       |                    | 0.0208                     |                    |
| <b>Maternal age at birth of cohort child</b> |                              |                    |                            |                    |
| 14 - 19y                                     | 1.42 (0.80, 2.51)            |                    | 1.52 (0.98, 2.37)          |                    |
| 20-24y                                       | 1.20 (0.68, 2.12)            |                    | 1.35 (0.89, 2.03)          |                    |
| 25-29y                                       | 1                            |                    | 1                          |                    |
| 30-34y                                       | 0.63 (0.37, 1.08)            |                    | 0.62 (0.40, 0.97)*         |                    |
| 35-39y                                       | 0.69 (0.40, 1.20)            |                    | 0.58 (0.37, 0.92)*         |                    |
| 40plus                                       | 0.57 (0.23, 1.43)            |                    | 0.86 (0.42, 1.74)          |                    |
| <i>p</i> -value                              | 0.0259                       |                    | <0.001                     |                    |
| <b>Maternal education</b>                    |                              |                    |                            |                    |
| Degree                                       | 1                            |                    | 1                          |                    |
| Diploma                                      | 1.35 (0.54, 3.36)            |                    | 0.78 (0.35, 1.72)          |                    |
| A or AS levels                               | 1.72 (0.79, 3.74)            |                    | 1.30 (0.71, 2.38)          |                    |
| GCSE A*-C                                    | 1.91 (1.05, 3.49)*           |                    | 1.21 (0.75, 1.96)          |                    |
| GCSE D-G                                     | 2.27 (1.07, 4.80)*           |                    | 1.13 (0.55, 2.34)          |                    |
| Other                                        | 0.80 (0.11, 5.93)            |                    | 1.29 (0.49, 3.39)          |                    |
| None                                         | 1.88 (0.87, 4.03)            |                    | 2.44 (1.63, 3.66)*         |                    |
| <i>p</i> -value                              | 0.2420                       |                    | <0.001                     |                    |
| <b>Housing tenure age 3</b>                  |                              |                    |                            |                    |
| Owned                                        | 1                            |                    | 1                          | 1                  |

|                                                    |                    |  |                    |                    |
|----------------------------------------------------|--------------------|--|--------------------|--------------------|
| Privately rented                                   | 0.86 (0.32, 2.34)  |  | 1.57 (0.96, 2.59)  | 1.51 (0.91, 2.48)  |
| Socially rented                                    | 1.49 (0.96, 2.32)  |  | 1.77 (1.29, 2.43)* | 1.86 (1.34, 2.56)* |
| Other                                              | 0.75 (0.27, 2.09)  |  | 2.20 (1.27, 3.79)* | 2.52 (1.23, 5.18)* |
| p-value                                            | 0.0936             |  | 0.0014             | <0.001             |
| <b>Household income (£ per annum)</b>              |                    |  |                    |                    |
| 0-11000                                            | 1                  |  | 1                  |                    |
| 11 000-22 000                                      | 0.86 (0.53, 1.41)  |  | 0.72 (0.52, 1.02)  |                    |
| 22 000-33 000                                      | 0.76 (0.44, 1.31)  |  | 0.39 (0.23, 0.66)  |                    |
| 33 000-55 000                                      | 0.31 (0.14, 0.70)* |  | 0.56 (0.36, 0.87)  |                    |
| 55 000+                                            | 0.76 (0.36, 1.61)  |  | 0.71 (0.39, 1.29)  |                    |
| p-value                                            | 0.0816             |  | 0.0028             |                    |
| <b>Social class (9 months)</b>                     |                    |  |                    |                    |
| Managerial & professional                          | 1                  |  | 1                  |                    |
| Intermediate                                       | 1.33 (0.73, 2.42)  |  | 0.89 (0.52, 1.53)  |                    |
| Small employer/self-employed                       | 0.83 (0.38, 1.79)  |  | 0.48 (0.20, 1.16)  |                    |
| Lower supervisory & technical                      | 0.90 (0.30, 2.67)  |  | 1.55 (0.80, 3.00)  |                    |
| Semi-routine & routine                             | 1.71 (1.11, 2.64)* |  | 1.29 (0.87, 1.92)  |                    |
| Never worked/unemployed                            | 1.87 (0.96, 3.64)  |  | 2.38 (1.62, 3.49)* |                    |
| p-value                                            | 0.0989             |  | <0.001             |                    |
| <b>Number of children in household (age 3)</b>     |                    |  |                    |                    |
| One child                                          | 1                  |  | 1                  |                    |
| Two or three children                              | 0.73 (0.47, 1.12)  |  | 0.77 (0.52, 1.14)  |                    |
| Four or more children                              | 0.66 (0.34, 1.29)  |  | 1.04 (0.67, 1.63)  |                    |
| p-value                                            | 0.2807             |  | 0.1832             |                    |
| <b>Maternal employment (age 3)</b>                 |                    |  |                    |                    |
| Full-time                                          | 1                  |  | 1                  |                    |
| Part-time                                          | 1.67 (0.84, 3.33)  |  | 1.02 (0.58, 1.79)  |                    |
| On leave                                           | 0.35 (0.05, 2.48)  |  | 1.04 (0.46, 2.33)  |                    |
| Self employed                                      | 1.04 (0.41, 2.66)  |  | 0.73 (0.37, 1.45)  |                    |
| Not employed/student                               | 1.50 (0.88, 2.57)  |  | 1.13 (0.71, 1.80)  |                    |
| p-value                                            | 0.1836             |  | 0.6517             |                    |
| <b>Sex of child</b>                                |                    |  |                    |                    |
| Male                                               | 1                  |  | 1                  |                    |
| Female                                             | 0.87 (0.60, 1.27)  |  | 1.27 (0.94, 1.71)  |                    |
| p-value                                            | 0.4755             |  | 0.1171             |                    |
| <b>Parental report of measles disease by age 3</b> |                    |  |                    |                    |
| Yes                                                | 1                  |  | 1                  |                    |
| No                                                 | 1.29 (0.48, 3.49)  |  | 1.28 (0.52, 3.16)  |                    |
| p-value                                            | 0.6163             |  | 0.5970             |                    |
| <b>Residence in London</b>                         |                    |  |                    |                    |
| London                                             | 1                  |  | 1                  | 1                  |
| Not London                                         | 0.84 (0.50, 1.41)  |  | 1.32 (0.86, 2.02)  | 1.95 (1.32, 2.89)* |
| p-value                                            | 0.5078             |  | 0.2012             | <0.001             |
| <b>Country of residence</b>                        |                    |  |                    |                    |
| England                                            | 1                  |  | 1                  |                    |
| Wales                                              | 1.26 (0.86, 1.84)  |  | 1.00 (0.69, 1.46)  |                    |
| Scotland                                           | 1.04 (0.60, 1.83)  |  | 1.16 (0.71, 1.88)  |                    |
| Northern Ireland                                   | 1.16 (0.55, 2.44)  |  | 1.11 (0.66, 1.88)  |                    |
| p-value                                            | 0.6802             |  | 0.9272             |                    |
| <b>Smoked during pregnancy</b>                     |                    |  |                    |                    |
| No                                                 | 1                  |  | 1                  |                    |

|                                                      |                   |  |                    |                    |
|------------------------------------------------------|-------------------|--|--------------------|--------------------|
| Yes                                                  | 1.20 (0.73, 1.74) |  | 0.05 (0.76, 1.46)  |                    |
| <i>p</i> -value                                      | 0.3202            |  | 0.7481             |                    |
| <b>Changed address since 3</b>                       |                   |  |                    |                    |
| No                                                   | 1                 |  |                    |                    |
| Yes                                                  | 0.90 (0.62, 1.32) |  | 0.77 (0.42, 1.43)  |                    |
| <i>p</i> -value                                      | 0.6031            |  | 0.4112             |                    |
| <b>Reasons given for not having had MMR (aged 3)</b> |                   |  |                    |                    |
| Practical                                            | 1                 |  | 1                  |                    |
| Medical                                              | 0.93 (0.44, 1.93) |  | 0.37 (0.20, 0.68)* | 0.43 (0.25, 0.74)* |
| Conscious decision                                   | 0.58 (0.27, 1.22) |  | 0.33 (0.23, 0.47)* | 0.33 (0.23, 0.48)* |
| Other                                                | 0.45 (0.16, 1.30) |  | 0.61 (0.40, 0.93)* | 0.46 (0.29, 0.73)* |
| <i>p</i> -value                                      | 0.1357            |  | <0.001             | <0.001             |

uRR = unadjusted risk ratio; aRR = adjusted risk ratio. \*  $p < 0.05$

### *Full catch-up (compared to remaining unimmunised)*

Table 2 also presents unadjusted and adjusted RRs for fully catching up. In the univariable analyses (Column C), children whose parents spoke a language other than English at home (as opposed to only speaking English), who were from ethnic minority groups (compared to White British), or lived in 'ethnic' wards (compared to 'advantaged' wards) were more likely to fully catch-up. Catch-up was also significantly more likely in children whose mother had no educational qualifications (compared to a degree), in lone parent families (compared to two parent families), and in those living in 'socially rented' or 'other' tenure types (compared to own/mortgage). Catch-up was significantly less likely in children with a mother in her thirties (compared to 24-29 years), and in children living in higher income households. Children whose parents had reported a non-practical reason ('medical', 'conscious decision', or 'other') for not having their child immunised with the combined MMR at age three were also less likely to have fully caught-up than those reporting practical reasons. Living in London was not associated with immunisation status, although due to its policy significance was included in the multivariable model reported below.

In the multivariable analysis (Column D), full catch-up remained significantly more likely in those who only spoke a non-English language at home (1.90 [1.08 to 3.32]), when compared to those who



1  
2  
3 only spoke English. Those from Pakistani or Bangladeshi (2.40 [1.38 to 4.18]), and 'Other' (1.88  
4 [1.08 to 3.29]) ethnic groups were more likely to have caught-up than White British groups, as were  
5 those living in 'socially rented' (1.86 [1.34 to 2.56]) or 'other' (2.52 [1.23 to 5.18]) tenure types  
6 (compared to own/mortgage). Full catch-up was also more likely in families living outside London  
7 (1.95 [1.32 to 2.89]). Compared to those reporting practical reasons for not having been  
8 immunised at age three, children whose parents reported medical reasons (0.43 [0.25 to 0.74]), a  
9 conscious decision (0.33 [0.23 to 0.48]), or 'other' reasons (0.46 [0.29 to 0.73]) were considerably  
10 less likely to have fully caught-up.  
11  
12  
13  
14  
15  
16  
17  
18  
19  
20  
21

22 Parents from Asian and "other White" backgrounds were 2-3 times more likely to experience  
23 practical barriers to immunisation than those from White British, Mixed or Black backgrounds.  
24  
25

26 Similarly, families who spoke a non-English language in the home were two-three times as likely to  
27 experience practical barriers as families who only spoke English at home (data not shown).  
28  
29  
30  
31

## 32 Discussion

33  
34 Just over 40% of children who were unimmunised with MMR vaccine at age three had either  
35 partially or fully caught-up by age five. The likelihood of catching-up varied markedly with a number  
36 of social factors, and more so for full than partial catch-up. Some families, particularly those from  
37 ethnic minority groups, appear to have difficulty accessing vaccination in a timely fashion.  
38  
39  
40  
41  
42

43 Advantaged families and those citing non-practical reasons for non-vaccination at age three are  
44 more likely to persist in not immunising their child against MMR.  
45  
46  
47  
48

49 We used sample and response weights to account for the survey design and attrition between the  
50 first, second, and third sweeps of the MCS. However the non-response weights are unlikely to have  
51 entirely accounted for differential response; for example 95.7% children who were included in the  
52 age three and five surveys were fully immunised with the primary vaccines (at age 9 months)  
53  
54  
55  
56  
57  
58  
59  
60

1  
2  
3 compared to 92.7% in children who did not take part in both of the later surveys ( $p < 0.001$ ). A  
4  
5 limitation of the study is that we utilised parental report of immunisation status, and it was not  
6  
7 possible to validate report of immunisation status against health system records. However there is  
8  
9 no gold standard measure of immunisation status and studies have found disagreement between  
10  
11 parental report and health records to be low<sup>15</sup> and not socially distributed<sup>16</sup>. Parents were given the  
12  
13 opportunity to consult the Personal Child Health Record (or 'red book'). Of the 751 families  
14  
15 included in our analysis, 19% (137) consulted the book and found the relevant information, 1% (11)  
16  
17 checked the book and did not find the relevant information, and 79% (603) chose not to consult the  
18  
19 book and relied on their memory. There was no association between catch-up status and whether  
20  
21 the parent consulted the red book ( $p = 0.18$ ), and the associations reported in this paper remained  
22  
23 the same when analyses were repeated excluding children where the parent had looked but not  
24  
25 found information (data not shown). A small number (26) of children who were unimmunised at  
26  
27 age three had received at least one single antigen vaccine by age five. Due to low numbers we were  
28  
29 unable to explore the characteristics of this group.  
30  
31  
32  
33  
34  
35  
36  
37

38 The intense negative media attention around the safety of the MMR vaccine peaked in 2002/3  
39  
40 when the MCS children were toddlers. These findings therefore provide important information on  
41  
42 the barriers to catch-up, in a cohort of children who are currently experiencing measles outbreaks  
43  
44 throughout the UK<sup>6</sup>, and are a central focus of the newly launched national catch-up programme.  
45  
46 However we measured catch-up across the period 2003/5 to 2006/7, when the MMR scare was at  
47  
48 its height and the incidence of measles was relatively low (although with some indications of a rise).  
49  
50 Concerns around the safety of the MMR have diminished over recent years and therefore the  
51  
52 characteristics of families who catch-up with the vaccine today may be different. It is also likely that  
53  
54 some of the barriers we report for more advantaged families are reduced during times of measles  
55  
56  
57  
58  
59  
60

1  
2  
3 outbreaks, as the perceived risk-benefit balance of the vaccine shifts. Nonetheless, this paper  
4  
5 provides important information on the barriers experienced by advantaged families during times of  
6  
7 no outbreak to improve and sustain the current MMR programme, which is also a central aim of the  
8  
9 catch-up programme. The recommended age of the first dose of MMR is 12/13 months; however  
10  
11 information on uptake was not collected in the MCS until the children were age three years. Our  
12  
13 analysis is unable to address those children who were immunised by age three but who had not  
14  
15 been immunised on time. Similarly, we were unable to investigate the timing of catch-up between  
16  
17 the age of three and five, and therefore how long children who partially or fully caught-up were left  
18  
19 susceptible. Finally, the MCS consists only of children who were born in the UK. The barriers  
20  
21 experienced by families from ethnic minority groups or who speak other may be different and/or  
22  
23 greater in families where the child was born outside the UK.  
24  
25  
26  
27  
28  
29  
30

31 Before the scare, MMR uptake was generally lower in more deprived areas and households<sup>17;18</sup>.  
32  
33 Since 1998, rates declined faster in more advantaged areas<sup>19;20</sup> and more slowly in areas with lower  
34  
35 proportions of highly educated residents<sup>20</sup> and in minority ethnic groups<sup>21</sup>. Earlier cross-sectional  
36  
37 findings from the MCS demonstrated that the likelihood of being unimmunised against measles,  
38  
39 mumps and rubella tended to be greater in more disadvantaged families, while children living in  
40  
41 more affluent households were more likely to receive single antigen vaccines (indicating conscious  
42  
43 rejection of combined MMR)<sup>8</sup>. However there is a dearth of longitudinal research exploring the  
44  
45 social correlates of catch-up with MMR. The only study, to our knowledge, which has explored the  
46  
47 social correlates of MMR catch-up was an ecological study of one million children born between  
48  
49 1987 and 2004 in Scotland. The authors found that children living in more affluent areas were  
50  
51 either immunised with MMR on time or not at all, whereas children living in deprived areas were  
52  
53 more likely to be immunised late<sup>20</sup>. Our findings not only reflect this, but add to the evidence base  
54  
55  
56  
57  
58  
59  
60

1  
2  
3 by demonstrating that individual-level predictors of catch-up are strongly related to catch-up. We  
4  
5 have also found that remaining unvaccinated with MMR at age five was associated with non-  
6  
7 practical reasons for not immunising with MMR at three, reflecting other research which has shown  
8  
9 that more affluent families are more likely to consciously reject MMR<sup>20;22</sup>.  
10  
11

12  
13  
14 Outbreaks of measles are currently being experienced across the UK, leading to the launch of a  
15  
16 national catch-programme in April 2013. Approaches to optimise uptake of MMR will need to be  
17  
18 tailored to the needs of local populations, both now and in the future. Our study has identified two  
19  
20 distinct groups of families that do not immunise their child with MMR in a timely fashion (during  
21  
22 periods of low measles incidence). The first comprises those who partially or fully catch-up,  
23  
24 amounting to 40% of those who were unimmunised at age three. These families tend to experience  
25  
26 practical barriers to immunisation, and are socially disadvantaged or from ethnic minority groups.  
27  
28 The second group, which continues to reject MMR and makes up the remaining 60%, consists of  
29  
30 parents who consciously reject MMR from the start, and are from more advantaged backgrounds.  
31  
32  
33  
34  
35  
36  
37

38 Steps are required to minimise time to uptake in those families who do eventually catch-up,  
39  
40 through the reduction of practical barriers. NICE guidance outlines actions to reduce inequalities in  
41  
42 immunisation<sup>23</sup>, including provision of information in multiple languages, offering immunisation  
43  
44 checks and administration in alternative settings, and sending out reminder invitations from GPs<sup>24</sup>.  
45  
46  
47

48 In addition, alleviating any lingering fears and concerns of families who consciously reject MMR is  
49  
50 essential. This should include discussion of concerns about 'medical' reasons for not giving MMR.  
51  
52 Mythical contraindications to MMR have circulated amongst the health professional community  
53  
54 and parents for some time<sup>25</sup> despite there being few true contraindications for MMR vaccination.  
55  
56

57 'Medical reasons' reported by parent for not immunising in the MCS (at age five) included: "child is  
58  
59  
60

1  
2  
3 not able to have it for health reasons” and “other medical problems or bad reactions”. It is not  
4  
5 possible to ascertain whether any of these were true contraindications, although there are very few  
6  
7 genuine contraindications to MMR<sup>2</sup> and these tend to be very rare. It was possible to look at  
8  
9 longstanding illness however, and children who had not been immunised for ‘medical reasons’ had  
10  
11 a higher prevalence of longstanding illness (38%) than overall prevalence in the cohort (15%).  
12  
13  
14 Conditions reported for children who had not been immunised and who had a long standing illness  
15  
16 included asthma, epilepsy, dermatitis/eczema and cerebral palsy, and although none appeared to  
17  
18 be true contraindications, some may have been incorrectly considered to be at that time, either by  
19  
20 the health professional or the parents themselves. NICE recommends offering parents  
21  
22 opportunities to discuss their concerns about vaccines or vaccine safety with health professionals;  
23  
24 receiving such information from health professionals has been found to be the decisive factor for  
25  
26 parents who have changed their minds about previously rejected or delayed vaccines<sup>26</sup>. In addition  
27  
28 training is recommended for health care professionals to equip them with the skills and information  
29  
30 needed to communicate effectively with parents about immunisation, to allay any fears over the  
31  
32 safety of the vaccine and any misinformation about medical contraindications. Finally, joint  
33  
34 working between the health sector and childcare providers, nurseries, and schools is essential<sup>23</sup>.  
35  
36  
37  
38  
39  
40  
41  
42

### 43 **Conclusions**

44  
45 Children born at the height of the MMR scare are being disproportionately affected by current  
46  
47 measles outbreaks and are the target of a newly launched national catch-up programme. Our  
48  
49 findings refer to children of this age and have identified the characteristics of two distinct groups of  
50  
51 parents who do not immunise their children with MMR on time. Health professionals should  
52  
53 consider their local populations in light of our findings, and tailor the local roll-out of the catch-up  
54  
55 programme accordingly.  
56  
57  
58  
59  
60

1  
2  
3  
4  
5 The new national immunisation framework not only aims to facilitate catch-up but also to  
6  
7 strengthen routine approaches to immunisation<sup>7</sup>. Findings from this study should be used to inform  
8  
9 longer-term local and national planning to improve and maintain timely uptake. While uptake of  
10  
11 the first dose of MMR in younger age groups has increased, levels remains below those required for  
12  
13 herd immunity and uptake of the second dose is lower still. Measles outbreaks remain a risk,  
14  
15 particularly in areas of the country with low uptake.  
16  
17  
18  
19  
20

## 21 **Acknowledgements**

22  
23 We would like to thank all the Millennium Cohort families for their participation, and the director of  
24  
25 the Millennium Cohort Study and colleagues in the management team at the Centre for  
26  
27 Longitudinal Studies, Institute of Education, University of London. We would also like to thank the  
28  
29 MCS user group at the MRC Centre of Epidemiology for Child Health: Catherine Law, Carol  
30  
31 Dezateux, Lucy Griffiths, Tim Cole, Phillippa Cumberland, Jamie Fagg, Francesco Sera, Steven Hope,  
32  
33 Hannah Lewis and Marco Geraci; also David Elliman, for his advice early on in the project.  
34  
35  
36  
37

## 38 **Funding**

39  
40 The Centre for Paediatric Epidemiology and Biostatistics is supported in part by the Medical  
41  
42 Research Council in its capacity as the MRC Centre of Epidemiology for Child Health (Grant  
43  
44 reference G0400546). Research at the UCL Institute of Child Health and Great Ormond Street  
45  
46 Hospital for Children receives a proportion of the funding from the Department of Health's National  
47  
48 Institute for Health Research Biomedical Research Centres funding scheme. AP is funded by a  
49  
50 Medical Research Council fellowship (grant reference MR/J012351/1). All researchers were  
51  
52 independent of the funders and the funders played no part in the study design, analysis or  
53  
54 interpretation of the data, writing of the report or the decision to submit for publication.  
55  
56  
57  
58  
59  
60

1  
2  
3 **Contributors:** MM and HB contributed to the study conception. All authors contributed to the  
4  
5 design of the analysis. AP, MM and MC-B carried out the analyses. AP and MM drafted the paper.  
6  
7 All authors revised the paper. All authors had full access to the data and take responsibility for the  
8  
9 integrity of the data and accuracy of the data analysis.  
10

11  
12 **Ethics approval:** Research ethics approval was not required for this study as it was a secondary data  
13  
14 analysis of the UK Millennium Cohort Study. The first sweep of the Millennium Cohort Study  
15  
16 received ethics approval from National Health Service Ethical Authority in February 2001  
17  
18 (MREC/01/6/19), and the second and third received approval from the London Multi-Centre  
19  
20 Research Ethics Committee in September 2004 (MREC/03/2/022) and December 2005  
21  
22 (05/MRE02/46).  
23

24  
25  
26 **Data sharing:** The Millennium Cohort Study is available at:

27  
28 <http://www.esds.ac.uk/findingData/mcs.asp>  
29

### 30 31 **Competing interests**

32  
33 All authors have completed the ICMJE uniform disclosure form at [ww.icmje.org/coi\\_disclosure.pdf](http://www.icmje.org/coi_disclosure.pdf)  
34  
35 and declare: no support from any organisation for the submitted work; MCB has received research  
36  
37 grants from the Health Protection Agency; no other relationships or activities that could appear to  
38  
39 have influenced the submitted work.  
40  
41

### 42 43 **Copyright/licence for publication**

44  
45 I, Helen Bedford, the Corresponding Author of this article contained within the original manuscript  
46  
47 which includes any diagrams & photographs, other illustrative material, video, film or any other  
48  
49 material howsoever submitted by the Contributor(s) at any time and related to the Contribution  
50  
51 (“the Contribution”) have the right to grant on behalf of all authors and do grant on behalf of all  
52  
53 authors, a licence to the BMJ Publishing Group Ltd and its licensees, to permit this Contribution (if  
54  
55 accepted) to be published in BMJ Open and any other BMJ Group products and to exploit all  
56  
57  
58  
59  
60

1  
2  
3 subsidiary rights, as set out in the licence at: [http://group.bmj.com/products/journals/instructions-](http://group.bmj.com/products/journals/instructions-for-authors/BMJOpen_licence.pdf)  
4  
5 [for-authors/BMJOpen\\_licence.pdf](http://group.bmj.com/products/journals/instructions-for-authors/BMJOpen_licence.pdf)  
6  
7  
8

#### References

- 11 1. The Information Centre. NHS Immunisation Statistics: England 2006-07, 2007.
- 12 2. Salisbury D, Ramsay M, Noakes K. Immunisation against infectious disease: the green book. In:  
13 England PH, editor, 2013. [https://www.gov.uk/government/organisations/public-health-](https://www.gov.uk/government/organisations/public-health-england/series/immunisation-against-infectious-disease-the-green-book)  
14 [england/series/immunisation-against-infectious-disease-the-green-book](https://www.gov.uk/government/organisations/public-health-england/series/immunisation-against-infectious-disease-the-green-book)  
15
- 16 3. Wakefield AJ, Murch SH, Anthony A, Linnell J, Casson DM, Malik M, et al. Ileal-lymphoid-nodular  
17 hyperplasia, non-specific colitis, and pervasive developmental disorder in children. *Lancet*  
18 1998;351 (9103):637-41.
- 19 4. Lancet. Retraction--Ileal-lymphoid-nodular hyperplasia, non-specific colitis, and  
20 pervasive developmental disorder in children. 2010 Feb *Lancet*. 2010;375(9713):445.
- 21 5. The Health and Social Care Information Centre Screening and Immunisations team. NHS  
22 Immunisation Statistics, England: 2011-12 In: Centre TI, editor, 2012.
- 23 6. Health Protection Agency. Confirmed cases of measles by region and age: 1996-2012.  
24 [http://www.hpa.org.uk/web/HPAweb&HPAwebStandard/HPAweb\\_C/1195733778332:](http://www.hpa.org.uk/web/HPAweb&HPAwebStandard/HPAweb_C/1195733778332)  
25 [http://www.hpa.org.uk/web/HPAweb&HPAwebStandard/HPAweb\\_C/1195733778332:](http://www.hpa.org.uk/web/HPAweb&HPAwebStandard/HPAweb_C/1195733778332)  
26 Public Health England, 2013.
- 27 7. Public Health England. MMR catch-up programme 2013. .  
28 [https://www.gov.uk/government/organisations/public-health-england/series/MMR-catch-](https://www.gov.uk/government/organisations/public-health-england/series/MMR-catch-up-programme-2013#publications)  
29 [up-programme-2013#publications](https://www.gov.uk/government/organisations/public-health-england/series/MMR-catch-up-programme-2013#publications): GOV.UK, 2013.
- 30 8. Pearce A, Law C, Elliman D, Cole TJ, Bedford H, the Millennium Cohort Study Child Health G.  
31 Factors associated with uptake of measles, mumps and rubella vaccine (MMR) and use of  
32 single antigen vaccines in a contemporary UK cohort: prospective cohort study. *British*  
33 *Medical Journal* 2008;336:754-60.
- 34 9. Centre for Longitudinal Studies. Millennium Cohort Study: Survey design: Institute of Education,  
35 2007.
- 36 10. Plewis I, Ketende S. Millennium Cohort Study: technical report on response. 1st ed. London  
37 Centre for Longitudinal Studies, 2006.
- 38 11. Hansen K, Joshi H. Millennium Cohort Study Third Survey: A User's Guide to Initial Findings.  
39 London: Institute of Education 2008.
- 40 12. Samad L, Bedford H, Tate AR, Dezateux C, Peckham C, Butler N, et al. Differences in risk factors  
41 for partial and no immunisation in the first year of life. *British Medical Journal* 2006;332  
42 1312-13.
- 43 13. Pearce A, Elliman D, Bedford H, Law C. Residential mobility and uptake of childhood  
44 immunisations: findings from the UK Millennium Cohort Study. *Vaccine* 2008;26:1675-80.
- 45 14. Plewis I. Millennium Cohort Study: technical report on sampling. 3rd ed. . London: Centre for  
46 Longitudinal Studies, 2004.
- 47 15. AbdelSalam HHM, Sokal MM. Accuracy of parental reporting of immunization. *Clinical Pediatrics*  
48 2004;43 (1):83-85.
- 49 16. Suarez L, Simpson DM, Smith DR. Errors and correlates in parental recall of child immunizations:  
50 effects on vaccination coverage estimates. *Pediatrics* 1997;99 (5):E3.
- 51  
52  
53  
54  
55  
56  
57  
58  
59  
60



17. Sharland M, Atkinson P, Maguire H, Begg N. Lone parent families are an independent risk factor for lower rates of childhood immunisation in London. *Communicable Disease Report.CDR Review* 1997;7 (11):R196-R72.
18. Li J, Taylor B. Factors affecting uptake of measles, mumps, and rubella immunisation. *British Medical Journal* 1993;307 168-71.
19. Middleton E, Baker D. Comparison of social distribution of immunisation with measles, mumps, and rubella vaccine, England, 1991-2001. *British Medical Journal* 2003;326 854-54.
20. Friederichs V, Cameron JC, Robertson C. Impact of adverse publicity on MMR vaccine uptake: a population based analysis of vaccine uptake records for one million children, born 1987-2004. *Archives of Disease in Childhood* 2006;91 465-68.
21. Hawker J, Olowokure B, Wood A, Wilson R, Johnson R. Widening inequalities in MMR vaccine uptake rates among ethnic groups in an urban area of the UK during a period of vaccine controversy (1994-2000). *Vaccine* 2007;25:7516-9.
22. MacDonald H, Henderson R, Oates K. Low uptake of immunisation: contributing factors. *Community Practitioner* 2004;77 (3):95-100.
23. National Institute for Health and Clinical Excellence. Reducing differences in the uptake of immunisations. *NICE public health guidance 21*, 2009.
24. Jacobson Vann J, Szilagyi P. Patient reminder and patient recall systems to improve immunization rates. *Cochrane Database Syst Rev.* 2005;Jul 20(3).
25. Bedford, H; Elliman, D. Concerns about immunisation. *British Medical Journal* 2000;320;7229: 240.
26. Gust D, Darling N, Kennedy A, Schwartz B. Parents with doubts about vaccines: which vaccines and reasons why. *Pediatrics* 2008;1227(4):18-25.

## Characteristics of five year olds who catch-up with MMR: findings from the UK Millennium Cohort

### Study

Anna Pearce (Research Fellow)<sup>1</sup>; Miranda Mindlin (Consultant in Communicable Disease Control)<sup>2,1</sup>;

Mario Cortina-Borja (Senior Lecturer)<sup>1</sup>; Helen Bedford (Senior Lecturer)<sup>1\*</sup>

<sup>1</sup>MRC Centre of Epidemiology for Child Health, UCL Institute of Child Health, 30 Guilford Street, London, WC1N 1EH, UK

<sup>2</sup> Kent, Surrey, Sussex Public Health England Centre, County Hall North, Chart Way, Horsham, West Sussex, RH12 1XA, UK

\*corresponding author and guarantor to the paper. [h.bedford@ucl.ac.uk](mailto:h.bedford@ucl.ac.uk). T 0207 905 2333; F 020 7905 2793

### Key words:

Socio-economic factors, immunisation, measles, measles-mumps-rubella vaccine, child health services

**Word count: 3441**

**Abstract***Objectives*

To examine predictors of partial and full MMR catch-up between three and five years

*Design*

Secondary data analysis of the nationally representative Millennium Cohort Study (MCS)

*Setting*

Children born in the UK, 2000-2

*Participants*

751 MCS children who were unimmunised against measles, mumps and rubella at age three, with immunisation information at age five

*Main outcome measures*

Catch-up status: unimmunised (received no MMR), partial catch-up (received one MMR), or full catch-up (received two MMRs)

*Results*

At age five, 60.3% ( $n=440$ ) children remained unvaccinated, 16.1% ( $n=127$ ) had partially, and 23.6% ( $n=184$ ) had fully caught-up. Children from families who did not speak English at home were five times as likely to partially catch-up than children living in homes where only English was spoken (risk ratio: 4.68 [95% CI, 3.63-6.03]). Full catch-up was also significantly more likely in those did not speak English at home (adjusted risk ratio: 1.90 [1.08-3.32]). In addition, those from Pakistani /Bangladeshi (2.40 [1.38-4.18]) or 'other' ethnicities (such as Chinese) (1.88 [1.08-3.29]) were more likely to fully catch-up than White British. Those living in socially rented (1.86 [1.34-2.56]) or 'Other' (2.52 [1.23-5.18]) accommodations were more likely to fully catch-up than home owners, and families were more likely to catch-up if they lived outside London (1.95 [1.32-2.89]). Full catch-up was less likely if parents reported medical reasons (0.43 [0.25-0.74]), a conscious decision (0.33

[0.23-0.48]), or 'other' reasons (0.46 [0.29-0.73]) for not immunising at age three (compared to 'practical' reasons).

### Conclusions

Parents who partially or fully catch-up with MMR experience practical barriers and tend to come from disadvantaged or ethnic minority groups. Families who continue to reject MMR tend to have more advantaged backgrounds and make a conscious decision to not immunise early on. Health professionals should consider these findings in light of the characteristics of their local populations.

### Article summary:

#### Article focus

- Areas of the UK are currently experiencing measles outbreaks, and a MMR national catch-up programme has just been launched
- Individual-level predictors of MMR catch-up are unknown
- We explore a range of risk factors for partial and full catch-up between age three and five years in the nationally representative UK Millennium Cohort Study

#### Key messages

- Of 751 children who were unimmunised at age three, 60% remained unimmunised at age five, 16% had partially caught-up, and 24% had fully caught-up
- Two distinct groups of parents emerged:
  - those who experienced practical barriers and were from **more disadvantaged groups/ethnic minority backgrounds** – these groups eventually caught-up
  - those who consciously rejected MMR and were from more advantaged circumstances – these groups tended to remain unimmunised

- 1  
2  
3 • Health professionals should consider these findings in light of the characteristics of their local  
4  
5 populations when designing programmes to increase and maintain uptake  
6  
7

#### 8 **Strengths and limitations of this study**

- 9  
10 • This is the first study to examine individual-level characteristics of MMR catch-up in the UK; we  
11  
12 do this using data from a nationally representative cohort of children who were born at the  
13  
14 height of the MMR scare and are currently being targeted by the national catch-up programme  
15  
16  
17 • Our analyses refer to predictors of catch-up during a period when parental concerns around the  
18 safety of the vaccine were relatively high, and the incidence of measles ~~was~~ relatively low;  
19  
20 predictors of catch- up in families with young children today may be different during times of  
21 measles outbreaks the perceived risk-benefit balance of the vaccine shifts, particularly for  
22 advantaged families.  
23  
24  
25  
26  
27  
28  
29 • We were unable to investigate exact timing of vaccination; therefore our analyses focus on  
30  
31 children who were unimmunised at age three (so approximately 2 years after the  
32  
33 recommended age of administration), and we were unable to detect how long children who had  
34  
35 partially or fully caught-up by age five had been left susceptible  
36  
37  
38  
39  
40  
41  
42  
43  
44  
45  
46  
47  
48  
49  
50  
51  
52  
53  
54  
55  
56  
57  
58  
59  
60

## Introduction

The combined measles, mumps and rubella vaccination (MMR) has been used routinely in the UK since 1988. Coverage at 2 years of age peaked in England in 1995, at 92%<sup>1</sup>. A two-dose schedule was introduced in 1996, the first dose recommended at soon after the age of 12/13 months<sup>2</sup> (affording 90-95% protection against measles), with a second at three years four months<sup>2</sup> (99% protection). In 1998, a Lancet article<sup>3</sup> was widely interpreted as suggesting MMR was linked with autism and bowel problems. Although the paper was eventually discredited and retracted by the Lancet in 2010<sup>4</sup>, widespread adverse media coverage in the intervening years led to a dramatic fall in MMR uptake, to a low of 80% in England (of the first dose by age two) in 2003<sup>1</sup>. By 2006-7, 85% of two year olds had received at least one MMR, although only 73% had received the recommended two doses by age five, and levels were particularly low in some geographical areas, such as London<sup>1</sup>. Measles cases started to rise and in 2008 the Health Protection Agency announced that measles was again endemic in England and Wales.

Although coverage has continued to rise (in England in 2011-12, 91% of two year olds had received one and 86% of five year olds two doses of MMR<sup>5</sup>), levels remain below those needed for herd immunity, particularly in some geographical areas and in children who were born in the late 1990s and early 2000s. Consequently, measles outbreaks are currently occurring across some areas of the UK, with young teenagers disproportionately affected (one quarter of measles cases in 2011-12 were in 10-14 year olds<sup>6</sup>). In response to this, Public Health England, NHS England and the Department of Health announced a national MMR catch-up programme to vaccinate as many partially or unimmunised 10-16 year olds as possible by the start of the next school year (September 2013)<sup>7</sup>. The catch-up programme outlines aims to strengthen current routine immunisation strategies and in particular to target hard to reach populations; GPs and schools will

1  
2  
3 play a central role. A better understanding of the social and demographic characteristics associated  
4  
5 with catching-up (or not), and the reasons reported by parents for their child's immunisation status,  
6  
7 is essential if the aims of the new framework are to be achieved and maintained. Cross-sectional  
8  
9 evidence indicates that, at age three, being unimmunised against MMR, or receiving the single  
10  
11 antigen vaccines, was socially distributed<sup>8</sup>. However little is known about the factors which  
12  
13 influence the propensity of families with unimmunised children to catch-up. We examine the social  
14  
15 correlates of partial and full catch-up with MMR between the age of three and five years, in a  
16  
17 nationally representative cohort of children born at the height of the MMR scare.  
18  
19  
20  
21  
22

## 23 **Methods**

### 24 *Participants*

25  
26 We analysed data from the Millennium Cohort Study (MCS), a longitudinal study of children eligible  
27  
28 for Child Benefit and born in the UK between September 2000 and January 2002. The sample was  
29  
30 derived from a random sample of electoral wards which were disproportionately stratified to  
31  
32 ensure an adequate representation of all four UK countries, deprived areas and, in the case of  
33  
34 England, areas with high proportions of families from ethnic minority groups<sup>9</sup>. At the first contact,  
35  
36 when the MCS children were aged 9 months, data were collected on 18,296 singleton babies (72%  
37  
38 of those approached); with subsequent data collections at three and five years. 71% of the initial  
39  
40 cohort responded to all three sweeps ( $n=12,989$ ). Participants in the second and third sweeps  
41  
42 were less likely to be from ethnic or deprived wards<sup>10;11</sup>, although due to the sampling design these  
43  
44 proportions remained higher than the general population.  
45  
46  
47  
48  
49  
50  
51

52  
53  
54 Our analyses focus on the subsample of MCS singleton children who were unimmunised against  
55  
56 measles, mumps or rubella at age three years. Of the 804 children who were unimmunised at age  
57  
58  
59  
60

three, 777 (96.6%) had a recorded MMR outcome at five years, and 26 (3.3%) of them were excluded because they were reported to have received at least one single antigen vaccine by age five, leaving 751 eligible participants in our analyses. Compared to the unimmunised children (who are the focus of this analysis), children who had been immunised with MMR at age three were: less likely to have a mother with a degree or A-levels, and more likely to have a mother in her twenties or early thirties or who did not smoke during pregnancy; they were also less likely to be living in a lone parent family and more likely to be an only child. The socio-economic and demographic characteristics of children according to MMR status at age three is described in greater detail elsewhere<sup>8</sup>.

### *Measures*

Measures were reported by the main respondent (usually the mother) during survey interviews, which were carried out by trained interviewers in the home.

Outcome measure: MMR status at age five was classified as unimmunised (received no combined MMR vaccines), partially caught-up (received one combined MMR), or fully caught-up (received two combined MMRs).

Covariates: We explored socio-economic and demographic factors that were found to be associated with immunisation status in earlier sweeps of the MCS<sup>8;12;13</sup>, or that were pertinent to immunisation policy. We examined maternal social class (based on National Statistics Socio-economic Classification (NS-SEC)), ethnicity, maternal age at birth (in five-year age bands), maternal education, and child gender. These measures were all captured at age nine months because they were unlikely to have changed in later sweeps. In addition, we explored the following time-variant



1  
2  
3 measures, captured at age three (the beginning of the potential catch-up period): UK country of  
4  
5 residence, ward type ('advantaged', 'disadvantaged', 'ethnic'), number of children in the  
6  
7 household, maternal employment status, lone parenthood, household income, housing tenure,  
8  
9 whether resident in London, whether the family had changed residential address since age three,  
10  
11 and whether the parents reported the child having natural measles infection. Income data were  
12  
13 missing for 14% (122) children at age three; we supplemented this with information captured at  
14  
15 age nine months, reducing the level of missingness to 24. Missing data were very low for all other  
16  
17 measures (listed at the foot of Table 1).  
18  
19  
20  
21  
22  
23

24 We also investigated reasons given for not having had MMR at age three, classified in a previous  
25  
26 analysis<sup>10</sup> as 'practical' (such as missing an appointment), 'medical' (e.g. child had asthma),  
27  
28 'conscious decision' (including fear of links with autism) or 'other' (which included don't know). The  
29  
30 mean age of the MCS children at the third survey was 61 months, with a range between 52 and 72  
31  
32 months, meaning that some children had more time to catch-up than others. We therefore  
33  
34 explored age as a potential confounder, but as it was not found to be associated with immunisation  
35  
36 status ( $p=0.28$ ) we did not include it in our models. There were no *a priori* hypotheses for  
37  
38 interactions so none were explored.  
39  
40  
41  
42  
43  
44

#### 45 *Analysis*

46  
47 We estimated the prevalence of MMR status (unimmunised, partially caught-up, and fully caught-  
48  
49 up) at age five, overall and according to the potential explanatory factors. We then fitted Poisson  
50  
51 regression models to estimate risk ratios (RRs) and 95% confidence intervals (CIs) for partial and full  
52  
53 catch-up (in two separate models, because previous research indicates that the social correlates of  
54  
55 partial and full immunisation are likely to differ<sup>12</sup>). The models were built as follows: first we  
56  
57  
58  
59  
60

1 explored univariable associations between the outcome and each of the explanatory variables.  
 2  
 3 Variables, which were associated with the outcome ( $p < 0.10$ ) using Wald tests for trend, were  
 4  
 5 entered into a multivariable model using a forward stepwise model selection strategy. Residence in  
 6  
 7 London was forced into the multivariable models, due to its potential significance for policy. Only  
 8  
 9 measures which remained significantly associated with the outcome after adjustment were  
 10  
 11 retained.  
 12  
 13  
 14  
 15  
 16  
 17  
 18  
 19

20 Data were downloaded from the UK Data Archive, University of Essex in May 2010. Analyses were  
 21  
 22 carried out in Stata 12 (Stata Corporation, TX) using survey and response weights to allow for the  
 23  
 24 sample design and attrition between sweeps<sup>10;14</sup>.  
 25  
 26  
 27  
 28

## 29 Results

30 Of the 751 MCS children who were unimmunised at age three, 60.3% (440) remained unvaccinated,  
 31  
 32 16.1% (127) had partially caught-up, and 23.6% (184) had fully caught-up. Table 1 presents the  
 33  
 34 proportion of children who were partially, fully, or unimmunised, according to the various predictor  
 35  
 36 measures.  
 37  
 38  
 39

40 **Table 1: Weighted percentage (n) of children who remained unimmunised or who partially for**  
 41  
 42 **fully caught-up with MMR, according to social, demographic and other characteristics**  
 43  
 44

|                                | Total      | Full catch-up<br>(2 doses) | Partial catch-up<br>(1 dose) | Unimmunised |
|--------------------------------|------------|----------------------------|------------------------------|-------------|
| <b>Language spoken at home</b> |            |                            |                              |             |
| English only                   | 91.6 (658) | 20.4 (130)                 | 15.8 (11.5)                  | 67.8 (413)  |
| English and other language(s)  | 5.7 (64)   | 53.0 (29)                  | 15.0 (9)                     | 32.0 (26)   |
| No - other language(s) only    | 2.7 (29)   | 70.2 (25)                  | 27.7 (3)                     | 2.1 (1)     |
| <b>Ward type</b>               |            |                            |                              |             |
| Advantaged                     | 56.5 (290) | 20.3 (60)                  | 13.6 (43)                    | 66.1 (187)  |
| Disadvantaged                  | 38.5 (5.0) | 24.1 (79)                  | 20.1 (73)                    | 55.8 (227)  |
| Ethnic                         | 5.0 (82)   | 57.6 (45)                  | 13.3 (11)                    | 29.2 (26)   |
| <b>Ethnicity</b>               |            |                            |                              |             |
| British white                  | 87.5 (644) | 20.3 (126)                 | 15.8 (111)                   | 63.9 (407)  |

|                                                |            |            |           |             |
|------------------------------------------------|------------|------------|-----------|-------------|
| Other white                                    | 2.2 (13)   | 10.3 (2)   | 15.6 (2)  | 74.1 (9)    |
| Mixed                                          | 1.4 (10)   | 33.5 (3)   | 15.1 (2)  | 51.4 (5)    |
| Indian                                         | 1.0 (12)   | 76.9 (9)   | 5.5 (1)   | 17.5 (2)    |
| Pakistani or Bangladeshi                       | 3.8 (39)   | 74.7 (28)  | 9.8 (3)   | 15.5 (8)    |
| Black or Black British                         | 2.7 (18)   | 24.7 (7)   | 35.1 (5)  | 40.2 (6)    |
| Other                                          | 1.4 (14)   | 65.2 (9)   | 19.6 (2)  | 15.2 (3)    |
| <b>Lone parent/carer</b>                       |            |            |           |             |
| Two parents/carers                             | 79.2 (597) | 21.9 (142) | 15.3 (97) | 62.9        |
| One parent/carer                               | 20.8 (154) | 30.2 (42)  | 19.3 (30) | 50.5 (82)   |
| <b>Maternal age at birth of cohort child</b>   |            |            |           |             |
| 14 - 19y                                       | 8.1 (60)   | 37.7 (21)  | 21.8 (14) | 40.6 (25)   |
| 20-24y                                         | 15.9 (130) | 34.3 (40)  | 19.4 (27) | 46.3 (63)   |
| 25-29y                                         | 23.5 (174) | 25.8 (52)  | 18.2 (27) | 55.9 (95)   |
| 30-34y                                         | 27.6 (205) | 17.0 (36)  | 13.0 (30) | 70.0 (13.9) |
| 35-39y                                         | 20.4 (145) | 15.8 (25)  | 14.3 (24) | 70.0 (96)   |
| 40plus                                         | 4.5 (36)   | 24.2 (9)   | 10.6 (5)  | 65.1 (22)   |
| <b>Maternal education</b>                      |            |            |           |             |
| Degree                                         | 20.8 (152) | 18.8 (32)  | 10.4 (15) | 70.7 (105)  |
| Diploma                                        | 8.9 (64)   | 13.9 (9)   | 14.9 (9)  | 71.1 (46)   |
| A or AS levels                                 | 11.3 (85)  | 22.7 (19)  | 17.0 (20) | 60.2 (46)   |
| GCSE A*-C                                      | 32.2 (238) | 20.4 (48)  | 19.6 (50) | 60.0 (140)  |
| GCSE D-G                                       | 8.4 (64)   | 18.1 (13)  | 23.9 (16) | 58.0 (35)   |
| Other                                          | 1.9 (15)   | 25.1 (6)   | 7.7 (1)   | 67.2 (8)    |
| None                                           | 16.4 (133) | 44.5 (57)  | 13.4 (16) | 42.1 (60)   |
| <b>Housing tenure age 3</b>                    |            |            |           |             |
| Owned                                          | 58.7 (451) | 18.1 (92)  | 15.6 (77) | 66.3 (282)  |
| Privately rented                               | 9.8 (71)   | 29.8 (18)  | 11.5 (8)  | 58.6 (45)   |
| Socially rented                                | 27.7 (199) | 30.4 (65)  | 19.8 (37) | 49.8 (16)   |
| Other                                          | 3.8 (30)   | 43.4 (9)   | 8.1 (5)   | 48.6 (16)   |
| <b>Household income (£ pa)</b>                 |            |            |           |             |
| 0-11000                                        | 23.7 (186) | 32.1 (57)  | 18.7 (34) | 49.2 (95)   |
| 11 000-22 000                                  | 30.4 (228) | 23.4 (56)  | 18.2 (41) | 58.4 (131)  |
| 22 000-33 000                                  | 19.9 (142) | 12.6 (21)  | 18.3 (34) | 69.1 (87)   |
| 33 000-55 000                                  | 17.4 (123) | 20.6 (28)  | 6.8 (8)   | 72.6 (87)   |
| 55 000+                                        | 8.9 (48)   | 23.5 (11)  | 15.9 (8)  | 60.6 (29)   |
| <b>Social class (9 months)</b>                 |            |            |           |             |
| Managerial & professional                      | 30.2 (222) | 20.8 (42)  | 12.7 (34) | 66.5 (14.6) |
| Intermediate                                   | 16.7 (119) | 17.5 (22)  | 17.6 (18) | 65.0 (79)   |
| Small employer/self-employed                   | 8.0 (53)   | 10.1 (10)  | 11.9 (8)  | 78.0 (35)   |
| Lower supervisory & technical                  | 4.0 (33)   | 33.4 (10)  | 9.6 (4)   | 57.1 (19)   |
| Semi-routine & routine                         | 32.0 (248) | 24.4 (61)  | 20.6 (53) | 54.9 (134)  |
| Never worked/unemployed                        | 9.2 (73)   | 47.8 (37)  | 15.6 (10) | 36.6 (26)   |
| <b>Number of children in household (age 3)</b> |            |            |           |             |
| One child                                      | 22.5 (180) | 26.2 (43)  | 20.0 (38) | 53.8 (99)   |
| Two or three children                          | 63.1 (459) | 21.3 (104) | 15.5 (73) | 63.2 (282)  |
| Four or more children                          | 14.4 (112) | 29.9 (37)  | 12.6 (16) | 57.6 (59)   |
| <b>Maternal employment (age 3)</b>             |            |            |           |             |
| FT                                             | 11.2 (93)  | 23.8 (21)  | 11.5 (17) | 64.7 (55)   |
| PT                                             | 25.2 (191) | 22.1 (41)  | 19.6 (37) | 58.3 (113)  |
| On leave                                       | 3.9 (28)   | 26.8 (8)   | 3.9 (1)   | 69.4 (19)   |
| Self employed                                  | 9.3 (60)   | 17.1 (13)  | 13.0 (10) | 69.9 (37)   |

|                                                      |            |            |            |             |
|------------------------------------------------------|------------|------------|------------|-------------|
| Not employed/student                                 | 50.4 (379) | 25.3 (101) | 16.9 (62)  | 57.8 (216)  |
| <b>Sex of child</b>                                  |            |            |            |             |
| Male                                                 | 55.1 (404) | 20.6 (95)  | 17.7 (70)  | 61.7 (239)  |
| Female                                               | 44.9 (347) | 27.3 (89)  | 14.1 (57)  | 58.6 (201)  |
| <b>Parental report of measles disease by age 3</b>   |            |            |            |             |
| Yes                                                  | 3.5 (22)   | 19.2 (5)   | 13.2 (3)   | 67.6 (14)   |
| No                                                   | 96.5 (721) | 23.7 (176) | 16.1 (123) | 60.2 (422)  |
| <b>Residence in London</b>                           |            |            |            |             |
| London                                               | 16.2 (102) | 17.7 (23)  | 20.0 (19)  | 62.3 (60)   |
| Not London                                           | 83.8 (649) | 24.8 (161) | 15.3 (108) | 60.0 (380)  |
| <b>Country of residence</b>                          |            |            |            |             |
| England                                              | 58.6 (462) | 23.3 (122) | 15.7 (74)  | 61.0 (266)  |
| Wales                                                | 21.6 (160) | 22.1 (31)  | 20.1 (31)  | 57.7 (98)   |
| Scotland                                             | 12.9 (87)  | 26.7 (21)  | 15.6 (14)  | 57.5 (52)   |
| Northern Ireland                                     | 6.9 (42)   | 25.3 (10)  | 17.8 (8)   | 60.0 (24)   |
| <b>Smoked during pregnancy</b>                       |            |            |            |             |
| No                                                   | 63.2 (465) | 23.4 (121) | 15.1 (76)  | 61.6 (268)  |
| Yes                                                  | 36.8 (283) | 23.8 (62)  | 18.0 (51)  | 58.2 (170)  |
| <b>Changed address since 3</b>                       |            |            |            |             |
| No                                                   | 85.6 (647) | 23.8 (161) | 16.6 (112) | 59.6 (374)  |
| Yes                                                  | 14.4 (104) | 22.4 (23)  | 13.1 (15)  | 64.5 (66)   |
| <b>Reasons given for not having had MMR (aged 3)</b> |            |            |            |             |
| Practical                                            | 6.2 (51)   | 54.5 (30)  | 15.3 (7)   | 30.3 (14)   |
| Medical                                              | 15.2 (107) | 17.9 (82)  | 25.5 (26)  | 56.7 (57)   |
| Conscious decision                                   | 66.7 (486) | 17.8 (82)  | 16.0 (85)  | 66.2 (31.9) |
| Other                                                | 11.7 (76)  | 35.3 (26)  | 9.9 (9)    | 54.9 (41)   |

Missing: Social class 3, smoked during pregnancy 3, income 24, ethnicity 1, reason 31, age at birth 1.

### *Partial catch-up (compared to remaining unimmunised)*

Table 2 (column A) shows unadjusted RRs for partial catch-up, according to each of the predictor measures. Partial catch-up was more likely in families who spoke a language other than English at home (particularly if English was not spoken at home at all), compared to those who only spoke English at home, and in those who lived in a ward classified as 'disadvantaged' or 'ethnic', compared to advantaged wards. No significant associations were seen with any of the other variables. When language, ward type and London residence (due to its policy significance) were entered into the multivariable model, only language remained significantly associated with the likelihood of being partially immunised, with an adjusted RR of 4.68 (3.63 to 6.03) in families who did not speak English at home (Table 2, Column B).

**Table 2: Unadjusted and adjusted odds ratios (ORs) for partial catch-up with the combined MMR vaccine (baseline unimmunised) by age five**

|                                              | Partial catch-up<br>(1 dose) |                    | Full catch-up<br>(2 doses) |                    |
|----------------------------------------------|------------------------------|--------------------|----------------------------|--------------------|
|                                              | A: uRR (95% CI)              | B: aRR (95% CI)    | C: uRR (95% CI)            | D: aRR (95% CI)    |
| <b>Language spoken at home</b>               |                              |                    |                            |                    |
| English only                                 | 1                            | 1                  | 1                          | 1                  |
| English and other language(s)                | 1.61 (0.96, 2.70)            | 1.61 (0.96, 2.70)  | 2.57 (2.00, 3.32)*         | 1.54 (0.91, 2.63)  |
| Other language(s) only                       | 4.68 (3.63, 6.03)*           | 4.68 (3.63, 6.03)* | 4.00 (3.37, 4.76)*         | 1.90 (1.08, 3.32)* |
| <i>p</i> -value                              | <0.001                       | <0.001             | <0.001                     | 0.0811             |
| <b>Ward type</b>                             |                              |                    |                            |                    |
| Advantaged                                   | 1                            |                    | 1                          |                    |
| Disadvantaged                                | 1.55 (1.05, 2.27)*           |                    | 1.29 (0.92, 1.80)          |                    |
| Ethnic                                       | 1.83 (1.18, 2.83)*           |                    | 2.83 (2.19, 3.65)*         |                    |
| <i>p</i> -value                              | 0.0146                       |                    | <0.001                     |                    |
| <b>Ethnicity</b>                             |                              |                    |                            |                    |
| British white                                | 1                            |                    | 1                          | 1                  |
| Other white                                  | 0.88 (0.22, 3.54)            |                    | 0.51 (0.13, 2.06)          | 0.37 (0.10, 1.34)  |
| Mixed                                        | 1.15 (0.29, 4.59)            |                    | 1.64 (0.57, 4.74)          | 1.83 (0.65, 5.17)  |
| Indian                                       | 1.21 (0.19, 7.82)            |                    | 3.38 (2.40, 4.76)*         | 2.01 (0.75, 5.41)  |
| Pakistani or Bangladeshi                     | 1.96 (0.84, 4.54)            |                    | 3.44 (2.79, 4.23)*         | 2.40 (1.38, 4.18)* |
| Black or Black British                       | 2.35 (0.99, 5.57)            |                    | 1.58 (0.73, 3.43)          | 1.12 (0.35, 3.63)  |
| Other                                        | 2.84 (1.12, 7.22)*           |                    | 3.36 (2.42, 4.67)*         | 1.88 (1.08, 3.29)* |
| <i>p</i> -value                              | 0.0126                       |                    | <0.001                     | 0.0950             |
| <b>Lone parent/carers</b>                    |                              |                    |                            |                    |
| Two parents/carers                           | 1                            |                    | 1                          |                    |
| One parent/carers                            | 1.42 (0.92, 2.17)            |                    | 1.45 (1.06, 1.99)*         |                    |
| <i>p</i> -value                              | 0.1110                       |                    | 0.0208                     |                    |
| <b>Maternal age at birth of cohort child</b> |                              |                    |                            |                    |
| 14 - 19y                                     | 1.42 (0.80, 2.51)            |                    | 1.52 (0.98, 2.37)          |                    |
| 20-24y                                       | 1.20 (0.68, 2.12)            |                    | 1.35 (0.89, 2.03)          |                    |
| 25-29y                                       | 1                            |                    | 1                          |                    |
| 30-34y                                       | 0.63 (0.37, 1.08)            |                    | 0.62 (0.40, 0.97)*         |                    |
| 35-39y                                       | 0.69 (0.40, 1.20)            |                    | 0.58 (0.37, 0.92)*         |                    |
| 40plus                                       | 0.57 (0.23, 1.43)            |                    | 0.86 (0.42, 1.74)          |                    |
| <i>p</i> -value                              | 0.0259                       |                    | <0.001                     |                    |
| <b>Maternal education</b>                    |                              |                    |                            |                    |
| Degree                                       | 1                            |                    | 1                          |                    |
| Diploma                                      | 1.35 (0.54, 3.36)            |                    | 0.78 (0.35, 1.72)          |                    |
| A or AS levels                               | 1.72 (0.79, 3.74)            |                    | 1.30 (0.71, 2.38)          |                    |
| GCSE A*-C                                    | 1.91 (1.05, 3.49)*           |                    | 1.21 (0.75, 1.96)          |                    |
| GCSE D-G                                     | 2.27 (1.07, 4.80)*           |                    | 1.13 (0.55, 2.34)          |                    |
| Other                                        | 0.80 (0.11, 5.93)            |                    | 1.29 (0.49, 3.39)          |                    |
| None                                         | 1.88 (0.87, 4.03)            |                    | 2.44 (1.63, 3.66)*         |                    |
| <i>p</i> -value                              | 0.2420                       |                    | <0.001                     |                    |
| <b>Housing tenure age 3</b>                  |                              |                    |                            |                    |
| Owned                                        | 1                            |                    | 1                          | 1                  |

|                                                    |                    |  |                    |                    |
|----------------------------------------------------|--------------------|--|--------------------|--------------------|
| Privately rented                                   | 0.86 (0.32, 2.34)  |  | 1.57 (0.96, 2.59)  | 1.51 (0.91, 2.48)  |
| Socially rented                                    | 1.49 (0.96, 2.32)  |  | 1.77 (1.29, 2.43)* | 1.86 (1.34, 2.56)* |
| Other                                              | 0.75 (0.27, 2.09)  |  | 2.20 (1.27, 3.79)* | 2.52 (1.23, 5.18)* |
| p-value                                            | 0.0936             |  | 0.0014             | <0.001             |
| <b>Household income (£ per annum)</b>              |                    |  |                    |                    |
| 0-11000                                            | 1                  |  | 1                  |                    |
| 11 000-22 000                                      | 0.86 (0.53, 1.41)  |  | 0.72 (0.52, 1.02)  |                    |
| 22 000-33 000                                      | 0.76 (0.44, 1.31)  |  | 0.39 (0.23, 0.66)  |                    |
| 33 000-55 000                                      | 0.31 (0.14, 0.70)* |  | 0.56 (0.36, 0.87)  |                    |
| 55 000+                                            | 0.76 (0.36, 1.61)  |  | 0.71 (0.39, 1.29)  |                    |
| p-value                                            | 0.0816             |  | 0.0028             |                    |
| <b>Social class (9 months)</b>                     |                    |  |                    |                    |
| Managerial & professional                          | 1                  |  | 1                  |                    |
| Intermediate                                       | 1.33 (0.73, 2.42)  |  | 0.89 (0.52, 1.53)  |                    |
| Small employer/self-employed                       | 0.83 (0.38, 1.79)  |  | 0.48 (0.20, 1.16)  |                    |
| Lower supervisory & technical                      | 0.90 (0.30, 2.67)  |  | 1.55 (0.80, 3.00)  |                    |
| Semi-routine & routine                             | 1.71 (1.11, 2.64)* |  | 1.29 (0.87, 1.92)  |                    |
| Never worked/unemployed                            | 1.87 (0.96, 3.64)  |  | 2.38 (1.62, 3.49)* |                    |
| p-value                                            | 0.0989             |  | <0.001             |                    |
| <b>Number of children in household (age 3)</b>     |                    |  |                    |                    |
| One child                                          | 1                  |  | 1                  |                    |
| Two or three children                              | 0.73 (0.47, 1.12)  |  | 0.77 (0.52, 1.14)  |                    |
| Four or more children                              | 0.66 (0.34, 1.29)  |  | 1.04 (0.67, 1.63)  |                    |
| p-value                                            | 0.2807             |  | 0.1832             |                    |
| <b>Maternal employment (age 3)</b>                 |                    |  |                    |                    |
| Full-time                                          | 1                  |  | 1                  |                    |
| Part-time                                          | 1.67 (0.84, 3.33)  |  | 1.02 (0.58, 1.79)  |                    |
| On leave                                           | 0.35 (0.05, 2.48)  |  | 1.04 (0.46, 2.33)  |                    |
| Self employed                                      | 1.04 (0.41, 2.66)  |  | 0.73 (0.37, 1.45)  |                    |
| Not employed/student                               | 1.50 (0.88, 2.57)  |  | 1.13 (0.71, 1.80)  |                    |
| p-value                                            | 0.1836             |  | 0.6517             |                    |
| <b>Sex of child</b>                                |                    |  |                    |                    |
| Male                                               | 1                  |  | 1                  |                    |
| Female                                             | 0.87 (0.60, 1.27)  |  | 1.27 (0.94, 1.71)  |                    |
| p-value                                            | 0.4755             |  | 0.1171             |                    |
| <b>Parental report of measles disease by age 3</b> |                    |  |                    |                    |
| Yes                                                | 1                  |  | 1                  |                    |
| No                                                 | 1.29 (0.48, 3.49)  |  | 1.28 (0.52, 3.16)  |                    |
| p-value                                            | 0.6163             |  | 0.5970             |                    |
| <b>Residence in London</b>                         |                    |  |                    |                    |
| London                                             | 1                  |  | 1                  | 1                  |
| Not London                                         | 0.84 (0.50, 1.41)  |  | 1.32 (0.86, 2.02)  | 1.95 (1.32, 2.89)* |
| p-value                                            | 0.5078             |  | 0.2012             | <0.001             |
| <b>Country of residence</b>                        |                    |  |                    |                    |
| England                                            | 1                  |  | 1                  |                    |
| Wales                                              | 1.26 (0.86, 1.84)  |  | 1.00 (0.69, 1.46)  |                    |
| Scotland                                           | 1.04 (0.60, 1.83)  |  | 1.16 (0.71, 1.88)  |                    |
| Northern Ireland                                   | 1.16 (0.55, 2.44)  |  | 1.11 (0.66, 1.88)  |                    |
| p-value                                            | 0.6802             |  | 0.9272             |                    |
| <b>Smoked during pregnancy</b>                     |                    |  |                    |                    |
| No                                                 | 1                  |  | 1                  |                    |

|                                                      |                   |  |                    |                    |
|------------------------------------------------------|-------------------|--|--------------------|--------------------|
| Yes                                                  | 1.20 (0.73, 1.74) |  | 0.05 (0.76, 1.46)  |                    |
| <i>p</i> -value                                      | 0.3202            |  | 0.7481             |                    |
| <b>Changed address since 3</b>                       |                   |  |                    |                    |
| No                                                   | 1                 |  |                    |                    |
| Yes                                                  | 0.90 (0.62, 1.32) |  | 0.77 (0.42, 1.43)  |                    |
| <i>p</i> -value                                      | 0.6031            |  | 0.4112             |                    |
| <b>Reasons given for not having had MMR (aged 3)</b> |                   |  |                    |                    |
| Practical                                            | 1                 |  | 1                  |                    |
| Medical                                              | 0.93 (0.44, 1.93) |  | 0.37 (0.20, 0.68)* | 0.43 (0.25, 0.74)* |
| Conscious decision                                   | 0.58 (0.27, 1.22) |  | 0.33 (0.23, 0.47)* | 0.33 (0.23, 0.48)* |
| Other                                                | 0.45 (0.16, 1.30) |  | 0.61 (0.40, 0.93)* | 0.46 (0.29, 0.73)* |
| <i>p</i> -value                                      | 0.1357            |  | <0.001             | <0.001             |

uRR = unadjusted risk ratio; aRR = adjusted risk ratio. \*  $p < 0.05$

### *Full catch-up (compared to remaining unimmunised)*

Table 2 also presents unadjusted and adjusted RRs for fully catching up. In the univariable analyses (Column C), children whose parents spoke a language other than English at home (as opposed to only speaking English), who were from ethnic minority groups (compared to White British), or lived in 'ethnic' wards (compared to 'advantaged' wards) were more likely to fully catch-up. Catch-up was also significantly more likely in children whose mother had no educational qualifications (compared to a degree), in lone parent families (compared to two parent families), and in those living in 'socially rented' or 'other' tenure types (compared to own/mortgage). Catch-up was significantly less likely in children with a mother in her thirties (compared to 24-29 years), and in children living in higher income households. Children whose parents had reported a non-practical reason ('medical', 'conscious decision', or 'other') for not having their child immunised with the combined MMR at age three were also less likely to have fully caught-up than those reporting practical reasons. Living in London was not associated with immunisation status, although due to its policy significance was included in the multivariable model reported below.

In the multivariable analysis (Column D), full catch-up remained significantly more likely in those who only spoke a non-English language at home (1.90 [1.08 to 3.32]), when compared to those who

1  
2  
3 only spoke English. Those from Pakistani or Bangladeshi (2.40 [1.38 to 4.18]), and 'Other' (1.88  
4 [1.08 to 3.29]) ethnic groups were more likely to have caught-up than White British groups, as were  
5 [1.08 to 3.29]) ethnic groups were more likely to have caught-up than White British groups, as were  
6 [1.08 to 3.29]) ethnic groups were more likely to have caught-up than White British groups, as were  
7 those living in 'socially rented' (1.86 [1.34 to 2.56]) or 'other' (2.52 [1.23 to 5.18]) tenure types  
8 (compared to own/mortgage). Full catch-up was also more likely in families living outside London  
9 (1.95 [1.32 to 2.89]). Compared to those reporting practical reasons for not having been  
10 immunised at age three, children whose parents reported medical reasons (0.43 [0.25 to 0.74]), a  
11 conscious decision (0.33 [0.23 to 0.48]), or 'other' reasons (0.46 [0.29 to 0.73]) were considerably  
12 less likely to have fully caught-up.  
13  
14  
15  
16  
17  
18  
19  
20  
21  
22  
23  
24  
25  
26  
27  
28  
29  
30  
31

Parents from Asian and "other White" backgrounds were 2-3 times more likely to experience practical barriers to immunisation than those from White British, Mixed or Black backgrounds.

Similarly, families who spoke a non-English language in the home were two-three times as likely to experience practical barriers as families who only spoke English at home (data not shown).

## 32 Discussion

33  
34 Just over 40% of children who were unimmunised with MMR vaccine at age three had either  
35 partially or fully caught-up by age five. The likelihood of catching-up varied markedly with a number  
36 of social factors, and more so for full than partial catch-up. Some families, particularly those from  
37 ethnic minority groups, appear to have difficulty accessing vaccination in a timely fashion.

38  
39 Advantaged families and those citing non-practical reasons for non-vaccination at age three are  
40 more likely to persist in not immunising their child against MMR.  
41  
42  
43  
44  
45  
46  
47  
48

49 We used sample and response weights to account for the survey design and attrition between the  
50 first, second, and third sweeps of the MCS. However the non-response weights are unlikely to have  
51 entirely accounted for differential response; for example 95.7% children who were included in the  
52 age three and five surveys were fully immunised with the primary vaccines (at age 9 months)  
53  
54  
55  
56  
57  
58  
59  
60



1  
2  
3 compared to 92.7% in children who did not take part in both of the later surveys ( $p < 0.001$ ).

4  
5 ~~Information bias may occur when~~ A limitation of the study is that we utilised using parental report  
6 ~~to measure~~ of immunisation status, and it was not possible to validate report of immunisation  
7 status against health system records. However there is no gold standard measure of immunisation  
8  
9  
10 status and studies have found disagreement between parental report and health records to be  
11  
12 low<sup>15</sup> and not socially distributed<sup>16</sup>. Parents were given the opportunity to consult the Personal  
13  
14 Child Health Record (or 'red book'). Of the 751 families included in our analysis, 19% (137)  
15  
16 consulted the book and found the relevant information, 1% (11) checked the book and did not find  
17  
18 the relevant information, and 79% (603) chose not to consult the book and relied on their memory.  
19  
20  
21  
22  
23  
24  
25  
26  
27  
28  
29  
30  
31  
32  
33  
34  
35  
36  
37  
38  
39  
40  
41  
42  
43  
44  
45  
46  
47  
48  
49  
50  
51  
52  
53  
54  
55  
56  
57  
58  
59  
60  
There was no association between catch-up status and whether the parent consulted the red book  
( $p = 0.18$ ), and the associations reported in this paper remained the same when analyses were  
repeated excluding children where the parent had looked but not found information (data not  
shown). A small number (26) of children who were unimmunised at age three had received at least  
one single antigen vaccine by age five. Due to low numbers we were unable to explore the  
characteristics of this group.

The intense negative media attention around the safety of the MMR vaccine peaked in 2002/3  
when the MCS children were toddlers. These findings therefore provide important information on  
the barriers to catch-up, in a cohort of children who are currently experiencing measles outbreaks  
throughout the UK<sup>6</sup>, and are a central focus of the newly launched national catch-up programme.

~~We~~ However we measured catch-up across the period 2003/5 to 2006/7, when the MMR scare was  
at its height and the incidence of measles was relatively low (although with some indications of a  
rise). Concerns around the safety of the MMR have diminished over recent years and therefore the  
characteristics of families who catch-up with the vaccine today may be different. It is also likely that

1  
2  
3 some of the barriers we report for more advantaged families are reduced during times of measles  
4  
5 outbreaks, as the perceived risk-benefit balance of the vaccine shifts. Nonetheless, this paper  
6  
7 provides important information on the barriers experienced by advantaged families during times of  
8  
9 no outbreak to improve and sustain the current MMR programme, which is also a central aim of the  
10  
11 catch-up programme. The recommended age of the first dose of MMR is 12/13 months; however  
12  
13 information on uptake was not collected in the MCS until the children were age three years. Our  
14  
15 analysis is unable to address those children who were immunised by age three but who had not  
16  
17 been immunised on time. Similarly, we were unable to investigate the timing of catch-up between  
18  
19 the age of three and five, and therefore how long children who partially or fully caught-up were left  
20  
21 susceptible. Finally, the MCS consists only of children who were born in the UK. The barriers  
22  
23 experienced by families from ethnic minority groups or who speak other may be different and/or  
24  
25 greater in families where the child was born outside the UK.  
26  
27  
28  
29  
30  
31  
32

33 Before the scare, MMR uptake was generally lower in more deprived areas and households<sup>17;18</sup>.  
34  
35 Since 1998, rates declined faster in more advantaged areas<sup>19;20</sup> and more slowly in areas with lower  
36  
37 proportions of highly educated residents<sup>20</sup> and in minority ethnic groups<sup>21</sup>. Earlier cross-sectional  
38  
39 findings from the MCS demonstrated that the likelihood of being unimmunised against measles,  
40  
41 mumps and rubella tended to be greater in more disadvantaged families, while children living in  
42  
43 more affluent households were more likely to receive single antigen vaccines (indicating conscious  
44  
45 rejection of combined MMR)<sup>8</sup>. However there is a dearth of longitudinal research exploring the  
46  
47 social correlates of catch-up with MMR. The only study, to our knowledge, which has explored the  
48  
49 social correlates of MMR catch-up was an ecological study of one million children born between  
50  
51 1987 and 2004 in Scotland. The authors found that children living in more affluent areas were  
52  
53 either immunised with MMR on time or not at all, whereas children living in deprived areas were  
54  
55  
56  
57  
58  
59  
60

1  
2  
3 more likely to be immunised late<sup>20</sup>. Our findings not only reflect this, but add to the evidence base  
4  
5 by demonstrating that individual-level predictors of catch-up are strongly related to catch-up. We  
6  
7 have also found that remaining unvaccinated with MMR at age five was associated with non-  
8  
9 practical reasons for not immunising with MMR at three, reflecting other research which has shown  
10  
11 that more affluent families are more likely to consciously reject MMR<sup>20;22</sup>.  
12  
13  
14  
15  
16

17 Outbreaks of measles are currently being experienced across the UK, leading to the launch of a  
18  
19 national catch-programme in April 2013. Approaches to optimise uptake of MMR will need to be  
20  
21 tailored to the needs of local populations, both now and in the future. Our study has identified two  
22  
23 distinct groups of families that do not immunise their child with MMR in a timely fashion (during  
24  
25 periods of low measles incidence). The first comprises those who partially or fully catch-up,  
26  
27 amounting to 40% of those who were unimmunised at age three. These families tend to experience  
28  
29 practical barriers to immunisation, and are socially disadvantaged or from ethnic minority groups.  
30  
31 The second group, which continues to reject MMR and makes up the remaining 60%, consists of  
32  
33 parents who consciously reject MMR from the start, and are from more advantaged backgrounds.  
34  
35  
36  
37  
38  
39

40 Steps are required to minimise time to uptake in those families who do eventually catch-up,  
41  
42 through the reduction of practical barriers. NICE guidance outlines actions to reduce inequalities in  
43  
44 immunisation<sup>23</sup>, including provision of information in multiple languages, offering immunisation  
45  
46 checks and administration in alternative settings, and sending out reminder invitations from GPs<sup>24</sup>.  
47  
48  
49

50 In addition, alleviating any lingering fears and concerns of families who consciously reject MMR is  
51  
52 essential. This should include discussion of concerns about 'medical' reasons for not giving MMR.

53 Mythical contraindications to MMR have circulated amongst the health professional community  
54  
55 and parents for some time<sup>25</sup> despite there being ~~there are~~ few true contraindications for MMR  
56  
57  
58  
59  
60

1  
2  
3 vaccination.-'Medical reasons' reported by parent for not immunising in the MCS (at age five)  
4 included: "child is not able to have it for health reasons" and "other medical problems or bad  
5 reactions". It is not possible to ascertain whether any of these were true contraindications,  
6 although there are very few genuine contraindications to MMR<sup>2</sup> and these tend to be very rare<sup>2</sup>. It  
7 was possible to look at longstanding illness however, and children who had not been immunised for  
8 'medical reasons' had a higher prevalence of longstanding illness (38%) than overall prevalence in  
9 the cohort (15%). Conditions reported for children who had not been immunised and who had a  
10 long standing illness included asthma, epilepsy, dermatitis/eczema and cerebral palsy, and although  
11 none appeared to be true contraindications, some may have been incorrectly considered to be at  
12 that time, either by the health professional or the parents themselves. NICE recommends offering  
13 parents opportunities to discuss their concerns about vaccines or vaccine safety with health  
14 professionals; receiving such information from health professionals has been found to be the  
15 decisive factor for parents who have changed their minds about previously rejected or delayed  
16 vaccines<sup>26</sup>. In addition training is recommended for health care professionals to equip them with  
17 the skills and information needed to communicate effectively with parents about immunisation, to  
18 allay any fears over the safety of the vaccine and any misinformation about medical  
19 contraindications. Finally, joint working between the health sector and childcare providers,  
20 nurseries, and schools is essential<sup>23</sup>.  
21  
22  
23  
24  
25  
26  
27  
28  
29  
30  
31  
32  
33  
34  
35  
36  
37  
38  
39  
40  
41  
42  
43  
44  
45  
46  
47

## 48 Conclusions

49  
50 Children born at the height of the MMR scare are being disproportionately affected by current  
51 measles outbreaks and are the target of a newly launched national catch-up programme. Our  
52 findings refer to children of this age and have identified the characteristics of two distinct groups of  
53 parents who do not immunise their children with MMR on time. Health professionals should  
54  
55  
56  
57  
58  
59  
60

1  
2  
3 consider their local populations in light of our findings, and tailor the local roll-out of the catch-up  
4  
5 programme accordingly.  
6  
7  
8  
9

10 The new national immunisation framework not only aims to facilitate catch-up but also to  
11  
12 strengthen routine approaches to immunisation<sup>7</sup>. Findings from this study should be used to inform  
13  
14 longer-term local and national planning to improve and maintain timely uptake. While uptake of  
15  
16 the first dose of MMR in younger age groups has increased, levels remains below those required for  
17  
18 herd immunity and uptake of the second dose is lower still. Measles outbreaks remain a risk,  
19  
20 particularly in areas of the country with low uptake.  
21  
22  
23  
24  
25

### 26 **Acknowledgements**

27  
28 We would like to thank all the Millennium Cohort families for their participation, and the director of  
29  
30 the Millennium Cohort Study and colleagues in the management team at the Centre for  
31  
32 Longitudinal Studies, Institute of Education, University of London. We would also like to thank the  
33  
34 MCS user group at the MRC Centre of Epidemiology for Child Health: Catherine Law, Carol  
35  
36 Dezateux, Lucy Griffiths, Tim Cole, Phillippa Cumberland, Jamie Fagg, Francesco Sera, Steven Hope,  
37  
38 Hannah Lewis and Marco Geraci; also David Elliman, for his advice early on in the project.  
39  
40  
41  
42

### 43 **Funding**

44  
45 The Centre for Paediatric Epidemiology and Biostatistics is supported in part by the Medical  
46  
47 Research Council in its capacity as the MRC Centre of Epidemiology for Child Health (Grant  
48  
49 reference G0400546). Research at the UCL Institute of Child Health and Great Ormond Street  
50  
51 Hospital for Children receives a proportion of the funding from the Department of Health's National  
52  
53 Institute for Health Research Biomedical Research Centres funding scheme. AP is funded by a  
54  
55 Medical Research Council fellowship. All researchers were independent of the funders and the  
56  
57  
58  
59  
60

1  
2  
3 funders played no part in the study design, analysis or interpretation of the data, writing of the  
4  
5 report or the decision to submit for publication.  
6

7 **Contributors:** MM and HB contributed to the study conception. All authors contributed to the  
8  
9 design of the analysis. AP, MM and MC-B carried out the analyses. AP and MM drafted the paper.  
10  
11 All authors revised the paper. All authors had full access to the data and take responsibility for the  
12  
13 integrity of the data and accuracy of the data analysis.  
14  
15

16  
17 **Ethics approval:** Research ethics approval was not required for this study as it was a secondary data  
18  
19 analysis of the UK Millennium Cohort Study. The first sweep of the Millennium Cohort Study  
20  
21 received ethics approval from National Health Service Ethical Authority in February 2001  
22  
23 (MREC/01/6/19), and the second and third received approval from the London Multi-Centre  
24  
25 Research Ethics Committee in September 2004 (MREC/03/2/022) and December 2005  
26  
27 (05/MRE02/46).  
28  
29

30  
31 **Data sharing:** The Millennium Cohort Study is available at:  
32

33 <http://www.esds.ac.uk/findingData/mcs.asp>  
34  
35

### 36 **Competing interests**

37  
38 All authors have completed the ICMJE uniform disclosure form at [ww.icmje.org/coi\\_disclosure.pdf](http://www.icmje.org/coi_disclosure.pdf)  
39  
40 and declare: no support from any organisation for the submitted work; MCB has received research  
41  
42 grants from the Health Protection Agency; no other relationships or activities that could appear to  
43  
44 have influenced the submitted work.  
45  
46

### 47 **Copyright/licence for publication**

48  
49 I, Helen Bedford, the Corresponding Author of this article contained within the original manuscript  
50  
51 which includes any diagrams & photographs, other illustrative material, video, film or any other  
52  
53 material howsoever submitted by the Contributor(s) at any time and related to the Contribution  
54  
55 (“the Contribution”) have the right to grant on behalf of all authors and do grant on behalf of all  
56  
57  
58  
59  
60

1  
2  
3 authors, a licence to the BMJ Publishing Group Ltd and its licensees, to permit this Contribution (if  
4  
5 accepted) to be published in BMJ Open and any other BMJ Group products and to exploit all  
6  
7 subsidiary rights, as set out in the licence at: [http://group.bmj.com/products/journals/instructions-](http://group.bmj.com/products/journals/instructions-for-authors/BMJOpen_licence.pdf)  
8  
9 [for-authors/BMJOpen\\_licence.pdf](http://group.bmj.com/products/journals/instructions-for-authors/BMJOpen_licence.pdf)  
10  
11  
12  
13  
14

#### References

- 15 1. The Information Centre. NHS Immunisation Statistics: England 2006-07, 2007.
- 16 2. Salisbury D, Ramsay M, Noakes K. Immunisation against infectious disease: the green book. In:  
17 England PH, editor, 2013. [https://www.gov.uk/government/organisations/public-health-](https://www.gov.uk/government/organisations/public-health-england/series/immunisation-against-infectious-disease-the-green-book)  
18 [england/series/immunisation-against-infectious-disease-the-green-book](https://www.gov.uk/government/organisations/public-health-england/series/immunisation-against-infectious-disease-the-green-book)  
19
- 20 3. Wakefield AJ, Murch SH, Anthony A, Linnell J, Casson DM, Malik M, et al. Ileal-lymphoid-nodular  
21 hyperplasia, non-specific colitis, and pervasive developmental disorder in children. *Lancet*  
22 1998;351 (9103):637-41.
- 23 4. Lancet. Retraction--Ileal-lymphoid-nodular hyperplasia, non-specific colitis, and  
24 pervasive developmental disorder in children. 2010 Feb *Lancet*. 2010;375(9713):445.
- 25 5. The Health and Social Care Information Centre Screening and Immunisations team. NHS  
26 Immunisation Statistics, England: 2011-12 In: Centre TI, editor, 2012.
- 27 6. Health Protection Agency. Confirmed cases of measles by region and age: 1996-2012.  
28 [http://www.hpa.org.uk/web/HPAweb&HPAwebStandard/HPAweb\\_C/1195733778332:](http://www.hpa.org.uk/web/HPAweb&HPAwebStandard/HPAweb_C/1195733778332)  
29 Public Health England, 2013.
- 30 7. Public Health England. MMR catch-up programme 2013. .  
31 [https://www.gov.uk/government/organisations/public-health-england/series/MMR-catch-](https://www.gov.uk/government/organisations/public-health-england/series/MMR-catch-up-programme-2013#publications)  
32 [up-programme-2013#publications](https://www.gov.uk/government/organisations/public-health-england/series/MMR-catch-up-programme-2013#publications): GOV.UK, 2013.
- 33 8. Pearce A, Law C, Elliman D, Cole TJ, Bedford H, the Millennium Cohort Study Child Health G.  
34 Factors associated with uptake of measles, mumps and rubella vaccine (MMR) and use of  
35 single antigen vaccines in a contemporary UK cohort: prospective cohort study. *British*  
36 *Medical Journal* 2008;336:754-60.
- 37 9. Centre for Longitudinal Studies. Millennium Cohort Study: Survey design: Institute of Education,  
38 2007.
- 39 10. Plewis I, Ketende S. Millennium Cohort Study: technical report on response. 1st ed. London  
40 Centre for Longitudinal Studies, 2006.
- 41 11. Hansen K, Joshi H. Millennium Cohort Study Third Survey: A User's Guide to Initial Findings.  
42 London: Institute of Education 2008.
- 43 12. Samad L, Bedford H, Tate AR, Dezateux C, Peckham C, Butler N, et al. Differences in risk factors  
44 for partial and no immunisation in the first year of life. *British Medical Journal* 2006;332  
45 1312-13.
- 46 13. Pearce A, Elliman D, Bedford H, Law C. Residential mobility and uptake of childhood  
47 immunisations: findings from the UK Millennium Cohort Study. *Vaccine* 2008;26:1675-80.
- 48 14. Plewis I. Millennium Cohort Study: technical report on sampling. 3rd ed. . London: Centre for  
49 Longitudinal Studies, 2004.
- 50 15. AbdelSalam HHM, Sokal MM. Accuracy of parental reporting of immunization. *Clinical Pediatrics*  
51 2004;43 (1):83-85.
- 52  
53  
54  
55  
56  
57  
58  
59  
60

- 1  
2  
3 16. Suarez L, Simpson DM, Smith DR. Errors and correlates in parental recall of child immunizations:  
4 effects on vaccination coverage estimates. *Pediatrics* 1997;99 (5):E3.  
5  
6 17. Sharland M, Atkinson P, Maguire H, Begg N. Lone parent families are an independent risk factor  
7 for lower rates of childhood immunisation in London. *Communicable Disease Report. CDR*  
8 *Review* 1997;7 (11):R196-R72.  
9  
10 18. Li J, Taylor B. Factors affecting uptake of measles, mumps, and rubella immunisation. *British*  
11 *Medical Journal* 1993;307 168-71.  
12  
13 19. Middleton E, Baker D. Comparison of social distribution of immunisation with measles, mumps,  
14 and rubella vaccine, England, 1991-2001. *British Medical Journal* 2003;326 854-54.  
15  
16 20. Friederichs V, Cameron JC, Robertson C. Impact of adverse publicity on MMR vaccine uptake: a  
17 population based analysis of vaccine uptake records for one million children, born 1987-  
18 2004. *Archives of Disease in Childhood* 2006;91 465-68.  
19  
20 21. Hawker J, Olowokure B, Wood A, Wilson R, Johnson R. Widening inequalities in MMR vaccine  
21 uptake rates among ethnic groups in an urban area of the UK during a period of vaccine  
22 controversy (1994-2000). *Vaccine* 2007;25:7516-9.  
23  
24 22. MacDonald H, Henderson R, Oates K. Low uptake of immunisation: contributing factors.  
25 *Community Practitioner* 2004;77 (3):95-100.  
26  
27 23. National Institute for Health and Clinical Excellence. Reducing differences in the uptake of  
28 immunisations. *NICE public health guidance 21*, 2009.  
29  
30 24. Jacobson Vann J, Szilagyi P. Patient reminder and patient recall systems to improve  
31 immunization rates. . *Cochrane Database Syst Rev.* 2005;Jul 20(3).  
32  
33 25 [Bedford, H; Elliman, D. Concerns about immunisation. \*British Medical Journal\* 2000;320;7229:  
34 240.](#)  
35  
36 26 [Gust D, Darling N, Kennedy A, Schwartz B. Parents with doubts about vaccines: which vaccines  
37 and reasons why. \*Pediatrics\* 2008;1227\(4\):18-25.](#)  
38  
39  
40  
41  
42  
43  
44  
45  
46  
47  
48  
49  
50  
51  
52  
53  
54  
55  
56  
57  
58  
59  
60



STROBE 2007 (v4) Statement—Checklist of items that should be included in reports of cohort studies

| Section/Topic             | Item # | Recommendation                                                                                                                                                                       | Reported on page # |
|---------------------------|--------|--------------------------------------------------------------------------------------------------------------------------------------------------------------------------------------|--------------------|
| Title and abstract        | 1      | (a) Indicate the study’s design with a commonly used term in the title or the abstract                                                                                               | 1                  |
|                           |        | (b) Provide in the abstract an informative and balanced summary of what was done and what was found                                                                                  | 2-3                |
| <b>Introduction</b>       |        |                                                                                                                                                                                      |                    |
| Background/rationale      | 2      | Explain the scientific background and rationale for the investigation being reported                                                                                                 | 5-6                |
| Objectives                | 3      | State specific objectives, including any prespecified hypotheses                                                                                                                     | 2, 6               |
| <b>Methods</b>            |        |                                                                                                                                                                                      |                    |
| Study design              | 4      | Present key elements of study design early in the paper                                                                                                                              | 2, 6               |
| Setting                   | 5      | Describe the setting, locations, and relevant dates, including periods of recruitment, exposure, follow-up, and data collection                                                      | 6-7                |
| Participants              | 6      | (a) Give the eligibility criteria, and the sources and methods of selection of participants. Describe methods of follow-up                                                           | 6-7                |
|                           |        | (b) For matched studies, give matching criteria and number of exposed and unexposed                                                                                                  |                    |
| Variables                 | 7      | Clearly define all outcomes, exposures, predictors, potential confounders, and effect modifiers. Give diagnostic criteria, if applicable                                             | 7-8                |
| Data sources/ measurement | 8*     | For each variable of interest, give sources of data and details of methods of assessment (measurement). Describe comparability of assessment methods if there is more than one group | 7                  |
| Bias                      | 9      | Describe any efforts to address potential sources of bias                                                                                                                            | 9, 15-16           |
| Study size                | 10     | Explain how the study size was arrived at                                                                                                                                            | 6-7                |
| Quantitative variables    | 11     | Explain how quantitative variables were handled in the analyses. If applicable, describe which groupings were chosen and why                                                         | 7                  |
| Statistical methods       | 12     | (a) Describe all statistical methods, including those used to control for confounding                                                                                                | 8                  |
|                           |        | (b) Describe any methods used to examine subgroups and interactions                                                                                                                  |                    |
|                           |        | (c) Explain how missing data were addressed                                                                                                                                          | 9, 15-16           |
|                           |        | (d) If applicable, explain how loss to follow-up was addressed                                                                                                                       | 9, 15-16           |
|                           |        | (e) Describe any sensitivity analyses                                                                                                                                                |                    |
| <b>Results</b>            |        |                                                                                                                                                                                      |                    |

|                          |     |                                                                                                                                                                                                              |         |
|--------------------------|-----|--------------------------------------------------------------------------------------------------------------------------------------------------------------------------------------------------------------|---------|
| Participants             | 13* | (a) Report numbers of individuals at each stage of study—eg numbers potentially eligible, examined for eligibility, confirmed eligible, included in the study, completing follow-up, and analysed            | 6-7     |
|                          |     | (b) Give reasons for non-participation at each stage                                                                                                                                                         | 6-7     |
|                          |     | (c) Consider use of a flow diagram                                                                                                                                                                           |         |
| Descriptive data         | 14* | (a) Give characteristics of study participants (eg demographic, clinical, social) and information on exposures and potential confounders                                                                     | Table 1 |
|                          |     | (b) Indicate number of participants with missing data for each variable of interest                                                                                                                          | Table 1 |
|                          |     | (c) Summarise follow-up time (eg, average and total amount)                                                                                                                                                  | 8       |
| Outcome data             | 15* | Report numbers of outcome events or summary measures over time                                                                                                                                               | 9       |
| Main results             | 16  | (a) Give unadjusted estimates and, if applicable, confounder-adjusted estimates and their precision (eg, 95% confidence interval). Make clear which confounders were adjusted for and why they were included | Table 2 |
|                          |     | (b) Report category boundaries when continuous variables were categorized                                                                                                                                    | Table 2 |
|                          |     | (c) If relevant, consider translating estimates of relative risk into absolute risk for a meaningful time period                                                                                             |         |
| Other analyses           | 17  | Report other analyses done—eg analyses of subgroups and interactions, and sensitivity analyses                                                                                                               | 15-16   |
| <b>Discussion</b>        |     |                                                                                                                                                                                                              |         |
| Key results              | 18  | Summarise key results with reference to study objectives                                                                                                                                                     | 15      |
| <b>Limitations</b>       |     |                                                                                                                                                                                                              |         |
| Interpretation           | 20  | Give a cautious overall interpretation of results considering objectives, limitations, multiplicity of analyses, results from similar studies, and other relevant evidence                                   | 15-18   |
| Generalisability         | 21  | Discuss the generalisability (external validity) of the study results                                                                                                                                        | 15      |
| <b>Other information</b> |     |                                                                                                                                                                                                              |         |
| Funding                  | 22  | Give the source of funding and the role of the funders for the present study and, if applicable, for the original study on which the present article is based                                                | 20      |

\*Give information separately for cases and controls in case-control studies and, if applicable, for exposed and unexposed groups in cohort and cross-sectional studies.

**Note:** An Explanation and Elaboration article discusses each checklist item and gives methodological background and published examples of transparent reporting. The STROBE checklist is best used in conjunction with this article (freely available on the Web sites of PLoS Medicine at <http://www.plosmedicine.org/>, Annals of Internal Medicine at <http://www.annals.org/>, and Epidemiology at <http://www.epidem.com/>). Information on the STROBE Initiative is available at [www.strobe-statement.org](http://www.strobe-statement.org).
